# Supplementary material for: High throughput mass spectrometry-based characterisation of Arabidopsis thaliana group H glycosyltransferases
Source: Royal Society of Chemistry journal article supplement (doi:10.1039/c8ra03947j), 2018-01-01
Supplement: c8ra03947j1.pdf [file c8ra03947j1.pdf]

# High Throughput Mass Spectrometry-based Characterisation of *Arabidopsis thaliana* GROUP H Glycosyltransferases

Aishat Akere,<sup>a</sup> Qian Liu,<sup>b</sup> Shibo Wu,<sup>a</sup> Bingkai Hou<sup>b</sup> and Min Yang<sup>a,\*</sup>

a. The School of Pharmacy, University College London, 29-39 Brunswick square, London WC1N 1AX

b. Key Laboratory of Plant Cell Engineering and Germplasm Innovation, Ministry of Education of China, School of Life Sciences, Shandong University, Jinan, 250100, China

\*Correspondence: Email: min.yang@ucl.ac.uk

## Phylogenetic classification of *Arabidopsis thaliana*

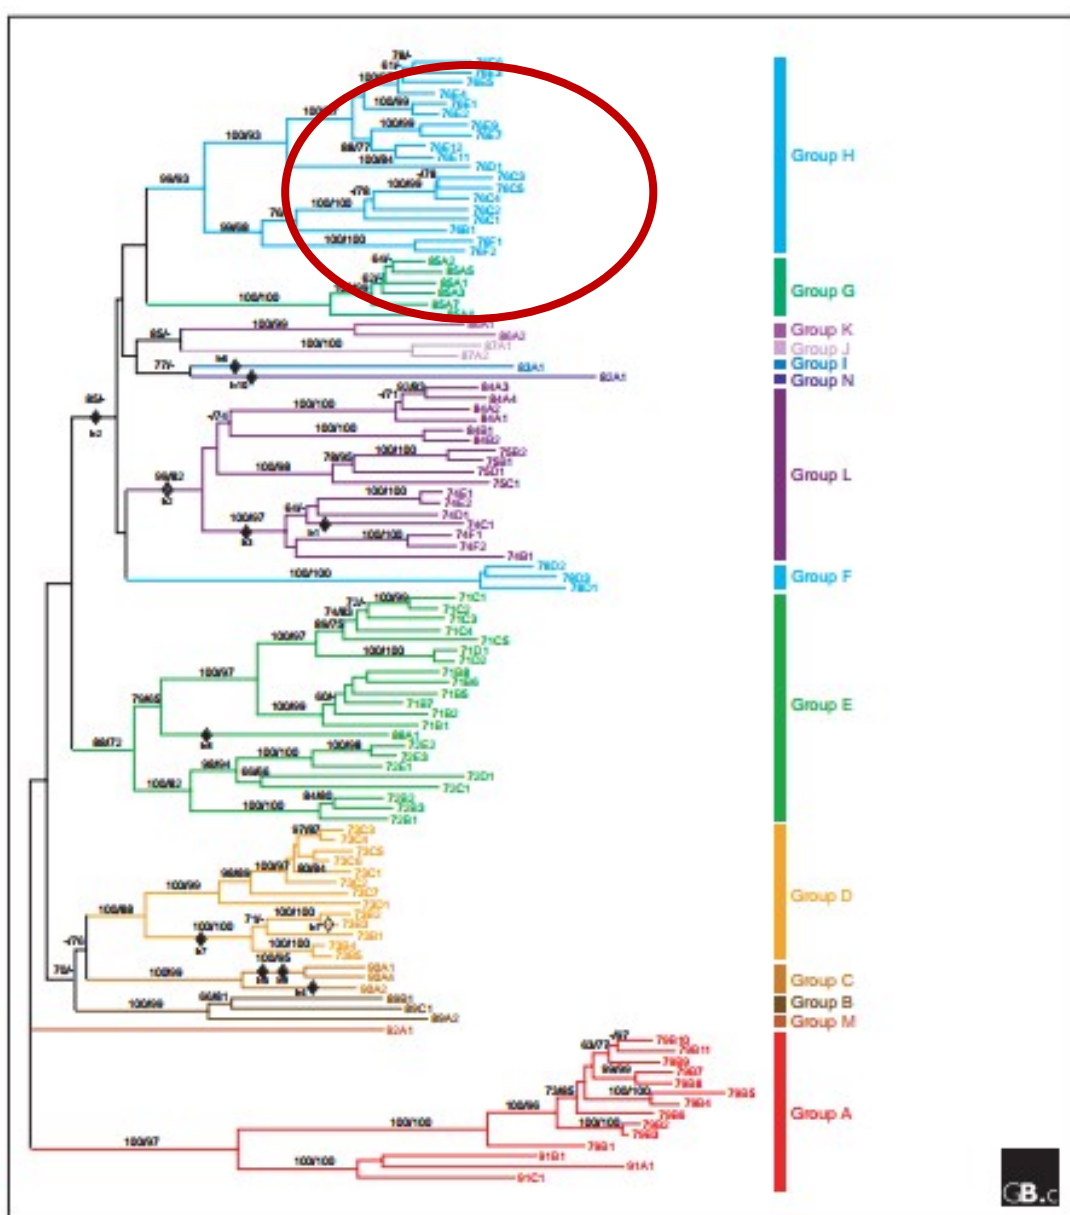

Fig 1: Phylogenetic grouping of *Arabidopsis thaliana* UGTs (Ross et al., 2001)

## RESULTS AND DISCUSSION

### Protein purification; SDS PAGE

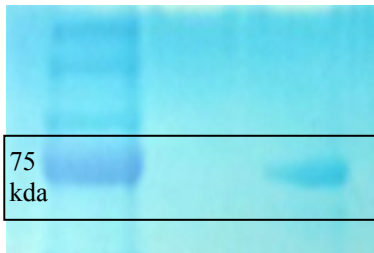

**Fig 2a: Lane 1: Protein ladder; Lane 3: Purified 76E5 MW ( 80kda)**

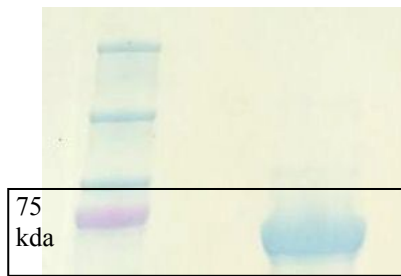

**Fig 2b: Lane 1: Protein ladder Lane 3: Purified 76E1 (MW 65kda)**

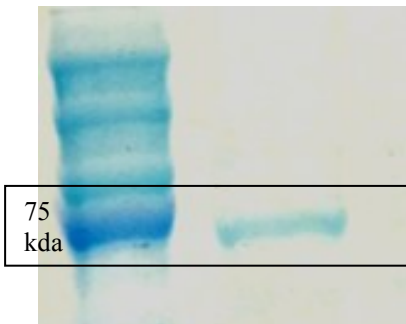

**Fig 2c: Lane 1: Protein ladder  
Lane 3: Purified 76D1 (MW 65kda)**

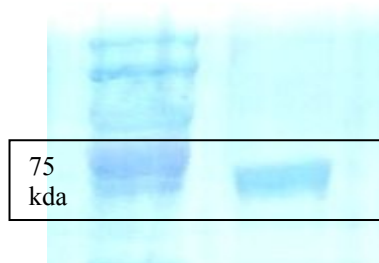

**Fig 2d: Lane 1: Protein ladder Lane 3: Purified 76E2 (MW 65kda)**

### ACCEPTOR LIBRARY USED

|    | Name                      | Structure                                                                           | Molecular weight |
|----|---------------------------|-------------------------------------------------------------------------------------|------------------|
| 1. | Umbelliferone             | 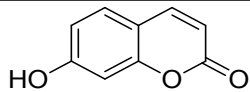   | 162.0            |
| 2. | Sinapic acid              |    | 224.0            |
| 3. | 3,4-dihydroxybenzoic acid |    | 154.0            |
| 4. | 2,5-dihydroxybenzoic acid |    | 154.0            |
| 5. | Abscisic acid             |   | 264.0            |
| 6. | Zeatin                    |  | 219.0            |
| 7. | Quercetin                 |  | 302.0            |
| 8. | Fisetin                   |  | 286.0            |
| 9. | Kaempferol                |  | 286.0            |

|     |            |                                                                                     |              |
|-----|------------|-------------------------------------------------------------------------------------|--------------|
| 10. | Scopoletin | 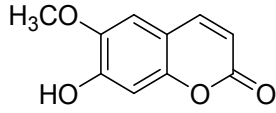   | <b>192.0</b> |
| 11. | Esculetin  |    | <b>178.0</b> |
| 12. | Novobiocin |   | <b>613.0</b> |
| 13  | Catechin   |    | <b>290.0</b> |
| 14  | Genistein  |  | <b>270.0</b> |
| 15  | Cyanidin   |  | <b>286.0</b> |
| 16  | Arbutin    |  | <b>272.0</b> |



|    |              |                                                                                      |              |
|----|--------------|--------------------------------------------------------------------------------------|--------------|
| 17 | Salicin      | 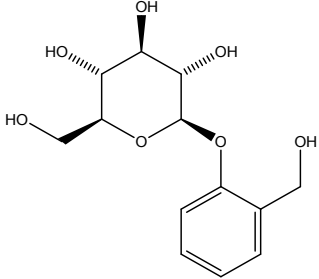    | <b>286.0</b> |
| 18 | Aloe-emodin  |     | <b>270.0</b> |
| 19 | Pelargonidin |     | <b>271.0</b> |
| 20 | Formononetin |   | <b>268.0</b> |
| 21 | Ferulic acid |  | <b>194.0</b> |
| 22 | Apomorphine  |   | <b>267.0</b> |
| 23 | Daidzein     |   | <b>254.0</b> |

|    |              |                                                                                      |              |
|----|--------------|--------------------------------------------------------------------------------------|--------------|
| 24 | Resveratrol  | 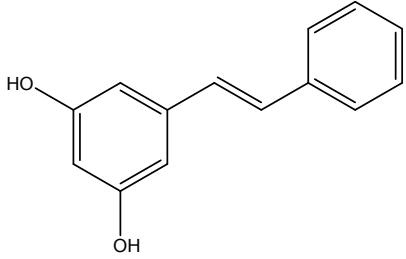    | <b>228.0</b> |
| 25 | Apigenin     |     | <b>270.0</b> |
| 26 | Isorhamnetin |    | <b>316.0</b> |
| 27 | Hesperetin   |   | <b>302.0</b> |
| 28 | Naringenin   |  | <b>272.0</b> |
| 29 | Delphinidin  |   | <b>303.0</b> |

|    |                  |                                                                                     |              |
|----|------------------|-------------------------------------------------------------------------------------|--------------|
| 30 | Galangin         | 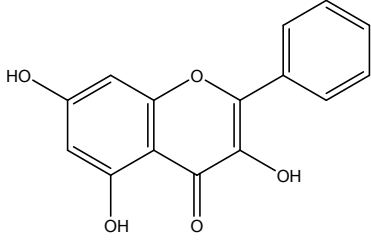   | <b>270.0</b> |
| 31 | Morin            |    | <b>302.0</b> |
| 32 | Biochanin A      |   | <b>284.0</b> |
| 33 | Eriodictyol      |   | <b>288.0</b> |
| 34 | Diosmetin        |  | <b>300.0</b> |
| 35 | Chrysin          |  | <b>254.0</b> |
| 36 | Dihydromyricetin |  | <b>320.0</b> |

|    |              |                                                                                      |              |
|----|--------------|--------------------------------------------------------------------------------------|--------------|
| 37 | Myricetin    | 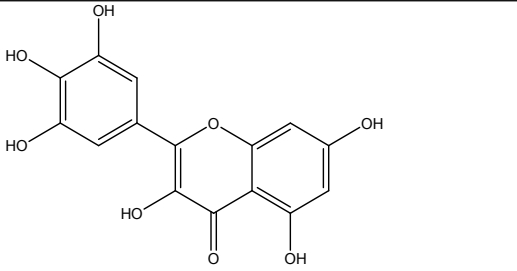   | <b>318.0</b> |
| 38 | Caffeic acid |    | <b>180.0</b> |
| 39 | Galantamine  |    | <b>287.0</b> |
| 40 | Rutin        |   | <b>611.0</b> |
| 41 | Morphine     |  | <b>285.0</b> |
| 42 | Quinine      |  | <b>324.0</b> |

**Table 1: Library of acceptor compounds screened**

## MASS SPECTRA SUMMARISED IN GAR SCREEN

### A) 76E1 Acceptor screening result

MS spectra; UDP Glucose (MW 162) was added to the test aglycones. m/z of target peaks (glycosylated products) are shown in bold in the red boxes below.

#### i) Apigenin

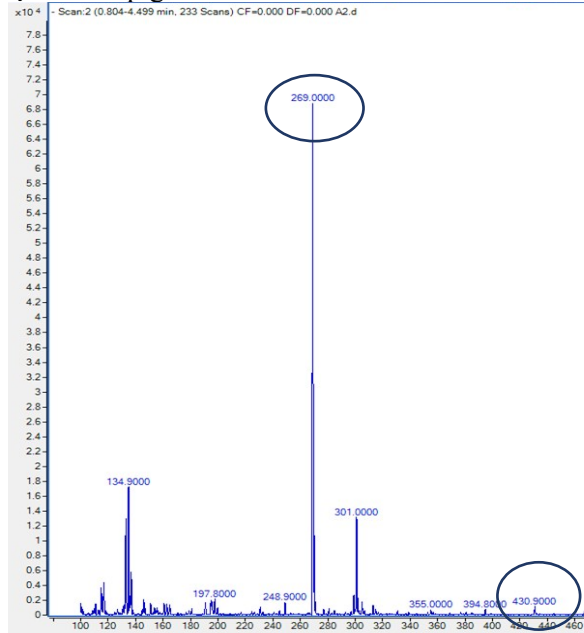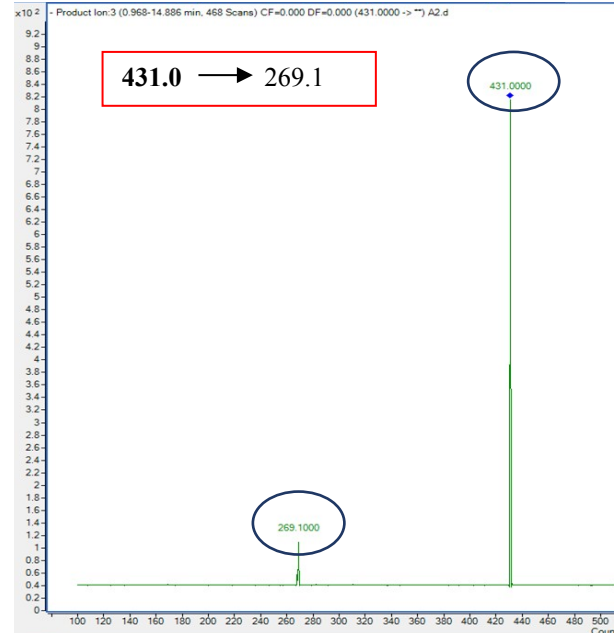

Fig 3a: MS spectrum of 76E1 glycosylation of apigenin (Full scan) Fig 3b: MS spectrum showing fragmentation of apigenin glucoside (Product ion scan)

MS/MS was used to fragment apigenin glucoside (MW 431). The observation of apigenin (MW 269) confirms the glucoside formation, and hence the glycosylation process.

#### ii) Esculetin

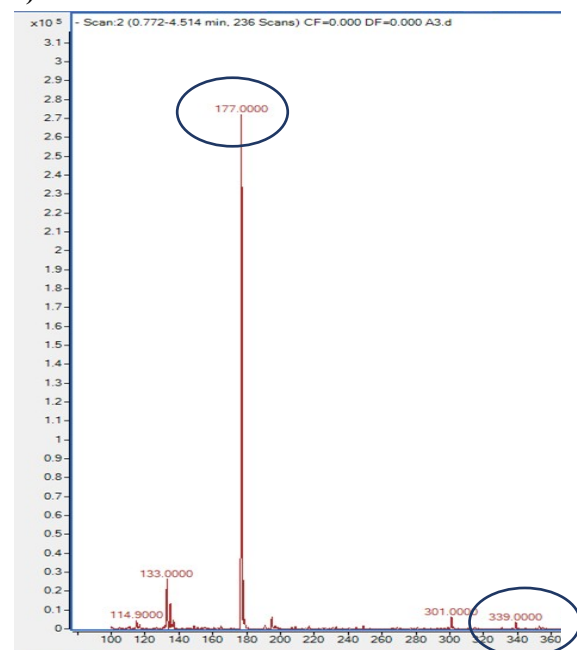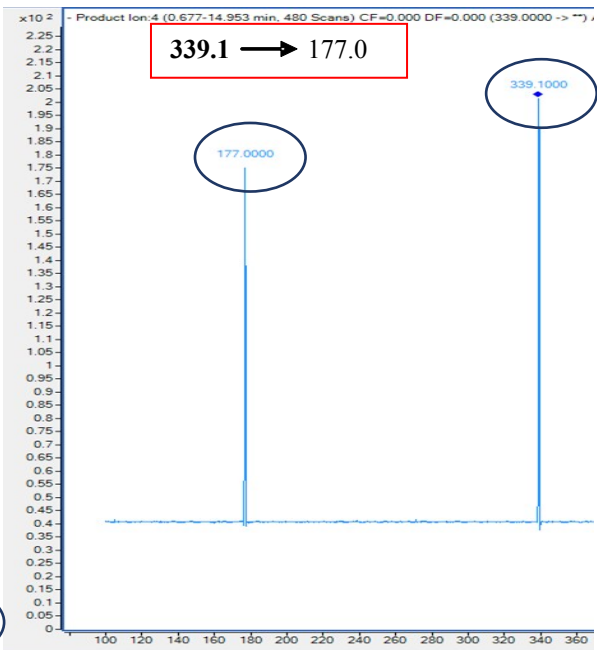

Fig 3c: MS spectrum of 76E1 glycosylation of esculetin (Full scan) 3d: MS spectrum showing fragmentation of esculetin glucoside (Product ion scan)

iii) **Quercetin**

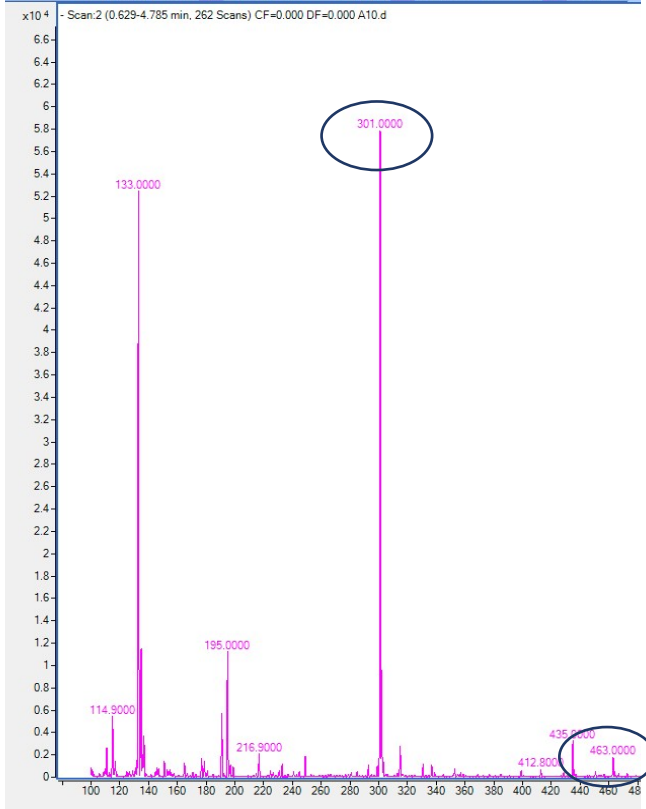

463.0 → 301.0

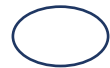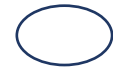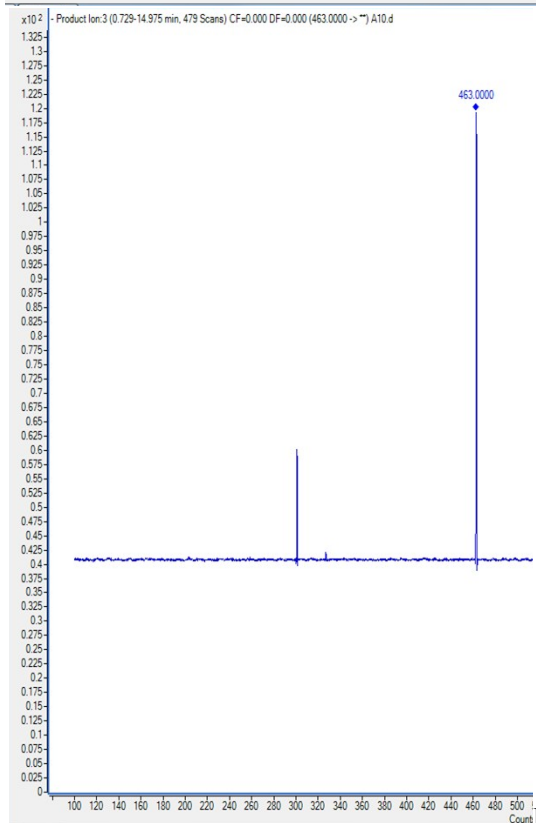

Fig 3e: MS spectrum of 76E1 glycosylation of quercetin

(Full scan) 3f: MS spectrum showing fragmentation of quercetin glucoside (Product ion scan)

iv) **Diosmetin**

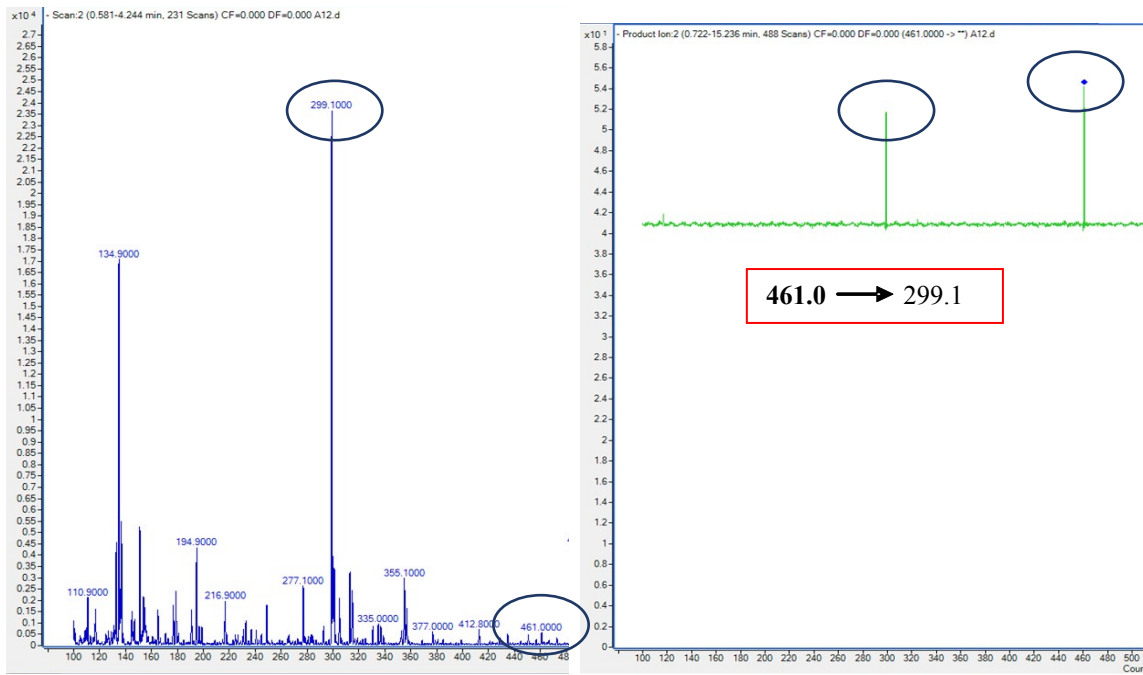

**Fig 3g: MS spectrum of 76E1 glycosylation of diosmetin (Full scan) 3h: MS spectrum showing fragmentation of diosmetin glucoside (Product ion scan)**

v) **Hesperetin**

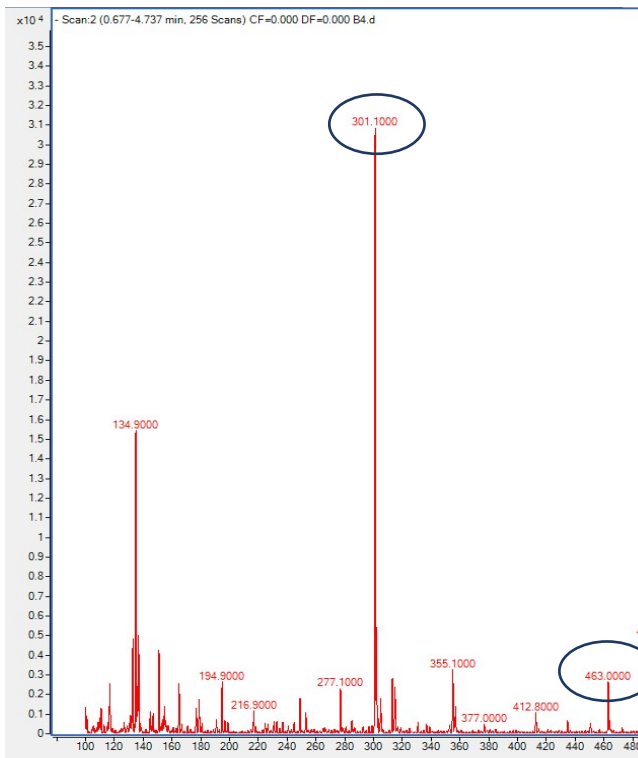

463.0 → 301.0

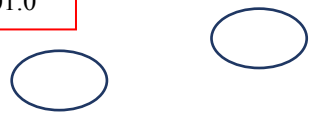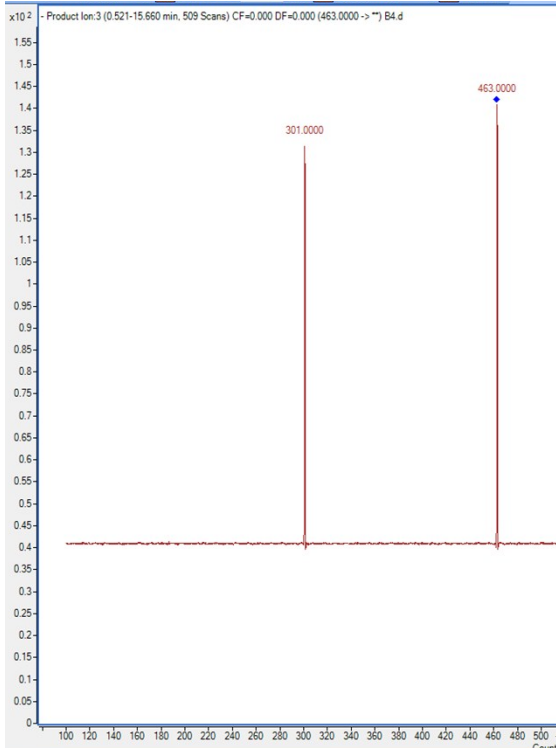

Fig 3i: MS spectrum of 76E1 glycosylation of hesperetin

(Full scan) 3j: MS spectrum showing fragmentation of hesperetin glucoside (Product ion scan)

vi) Naringenin



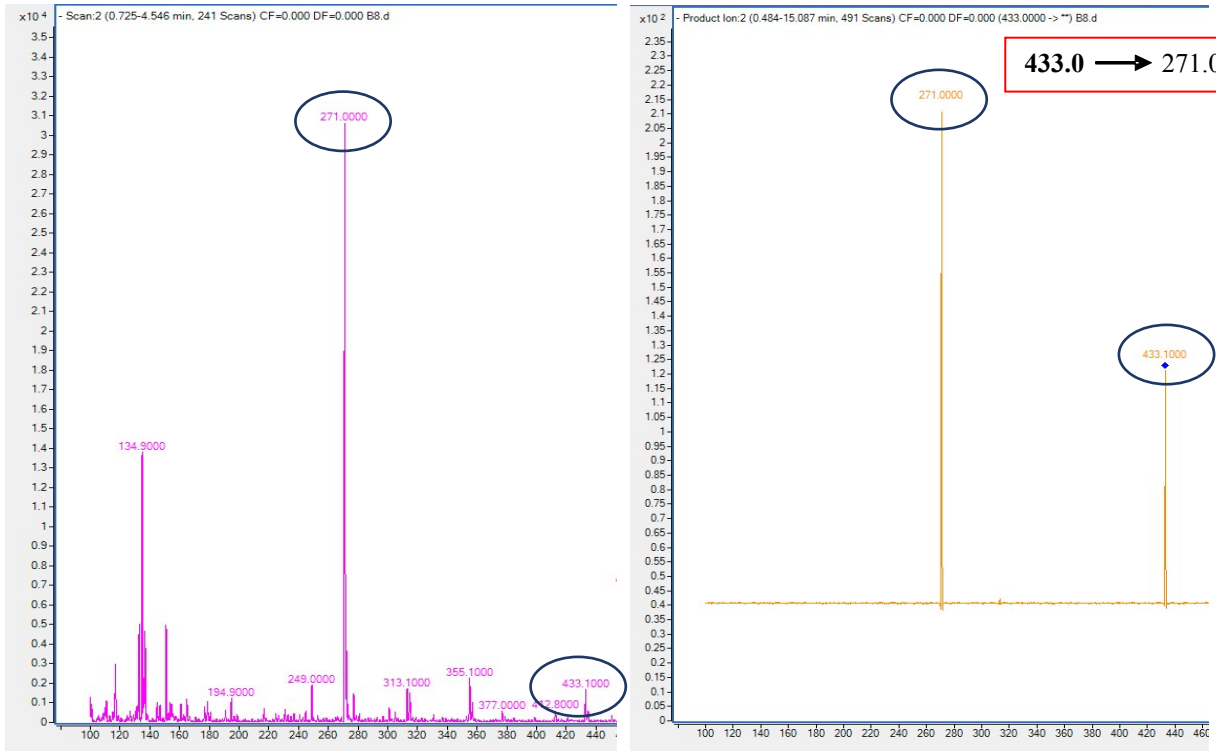

**Fig 3k: MS spectrum of 76E1 glycosylation of naringenin (Full scan) 3l: MS spectrum showing fragmentation of naringenin glucoside (Product ion scan)**

vii) Eriodictyol

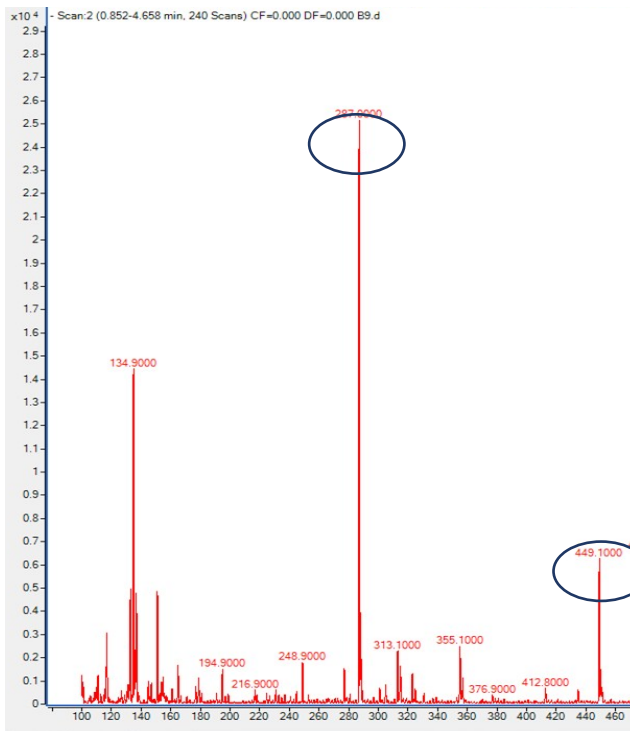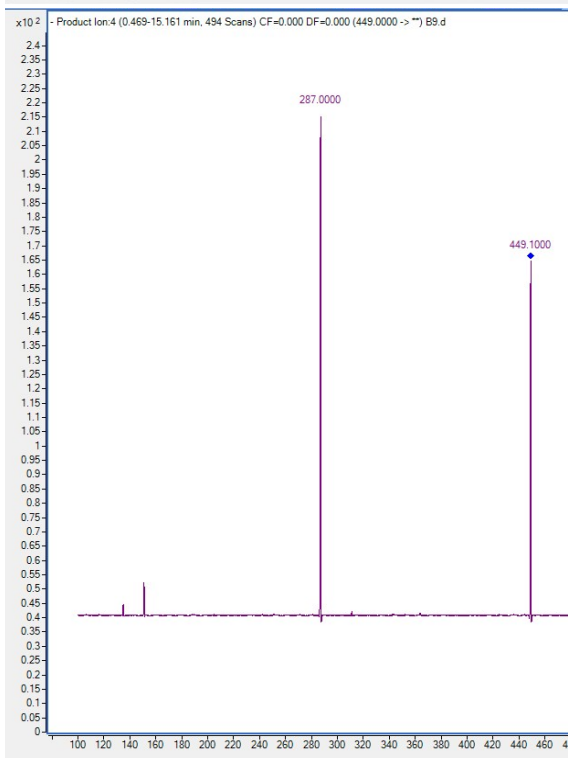

Fig 3m: MS spectrum of 76E1 glycosylation of eriodictyol (Full scan) 3n: MS spectrum showing fragmentation of eriodictyol glucoside (Product ion scan)

viii) Kaempferol

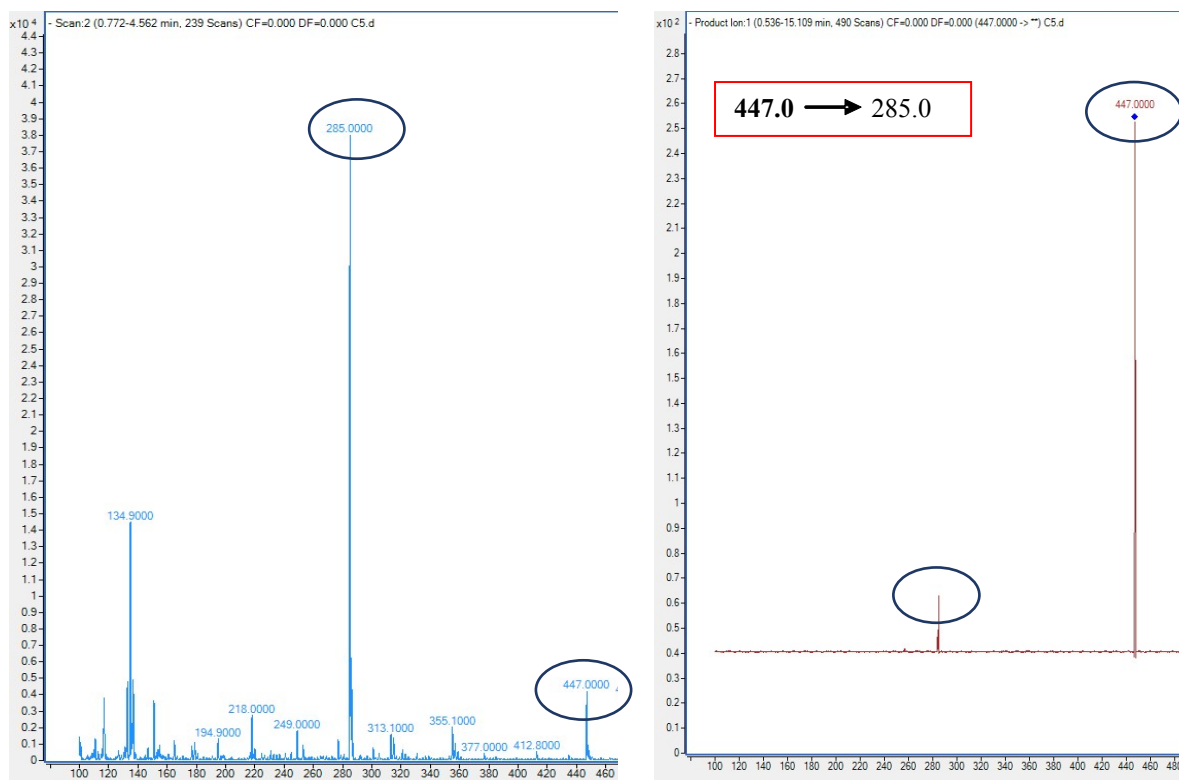

**Fig 3p: MS spectrum of 76E1 glycosylation of kaempferol (Full scan) 3p: MS spectrum showing fragmentation of kaempferol glucoside (Product ion scan)**

**ix) Fisetin**

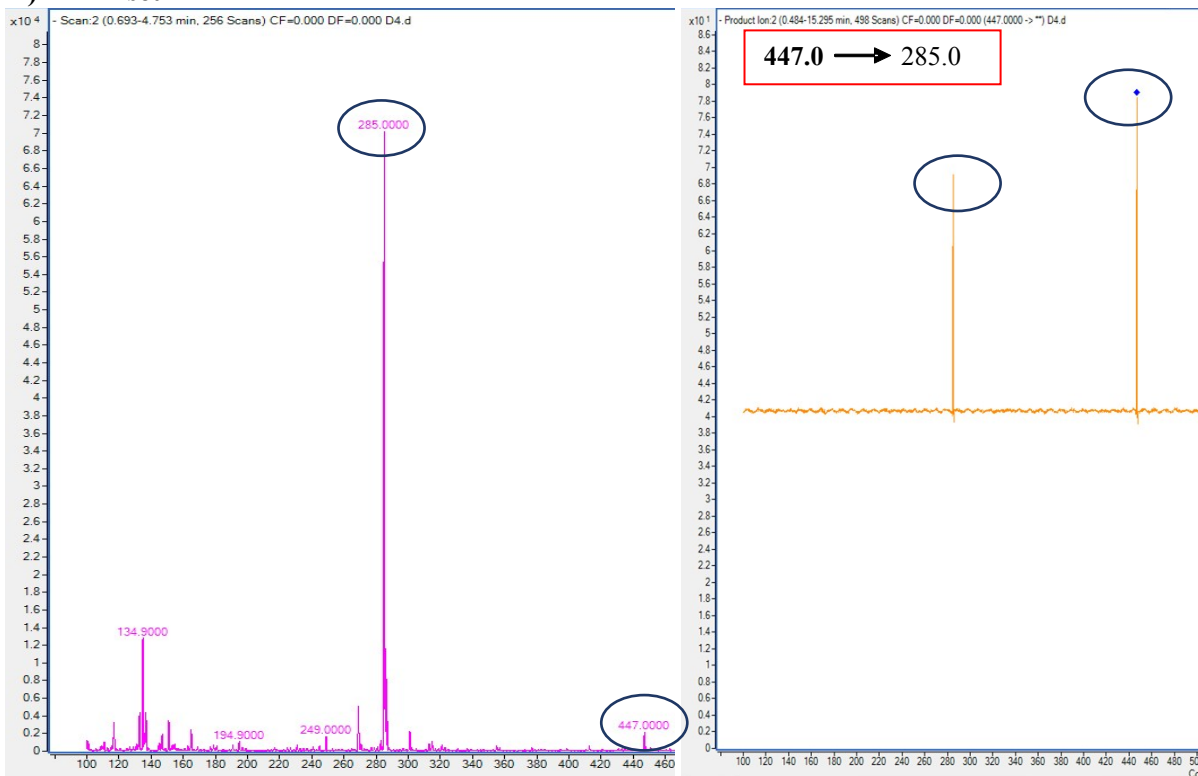

**Fig 3q: MS spectrum of 76E1 glycosylation of fisetin (Full scan) 3r: MS spectrum showing fragmentation of fisetin glucoside (Product ion scan)**

**B) 76E2 Acceptor screening**

i) Quercetin

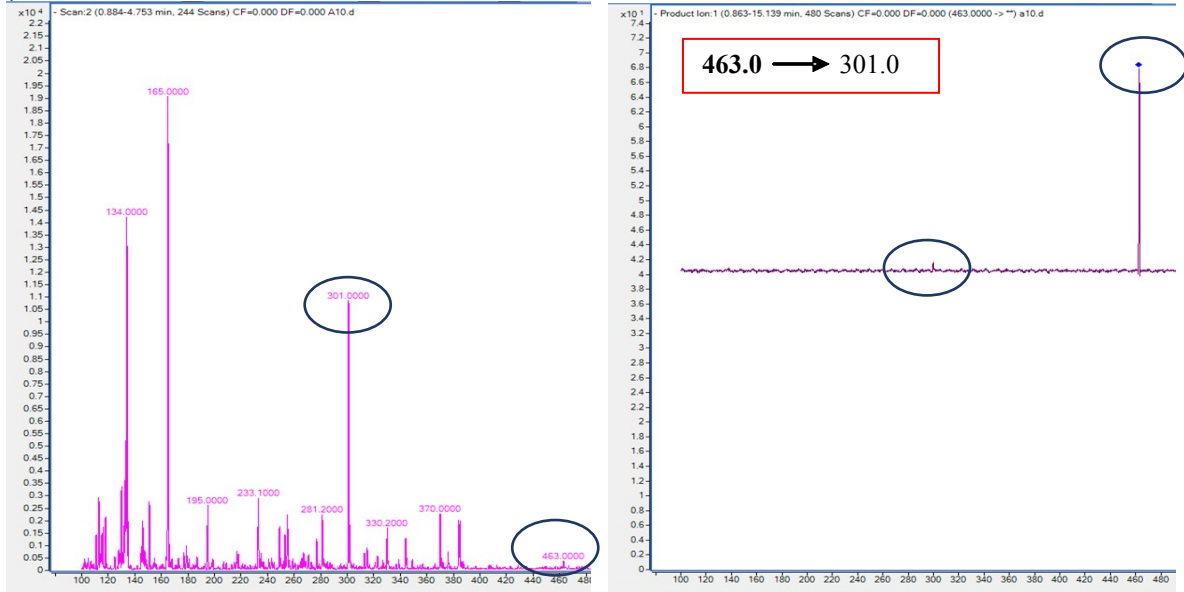

Fig 4a: MS spectrum of 76E2 glycosylation of quercetin (Full scan) 4b: MS spectrum showing fragmentation of quercetin glucoside (Product ion scan)

ii) Myricetin

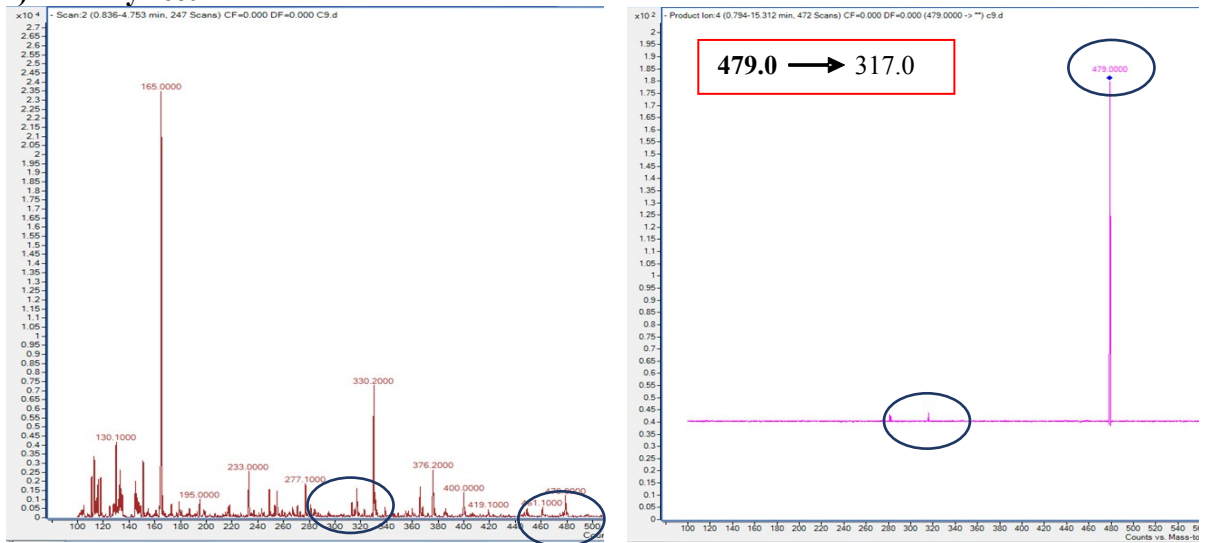

Fig 4c: MS spectrum of 76E2 glycosylation of myricetin (Full scan) 4d: MS spectrum showing fragmentation of myricetin glucoside (Product ion scan)

iii) Fisetin

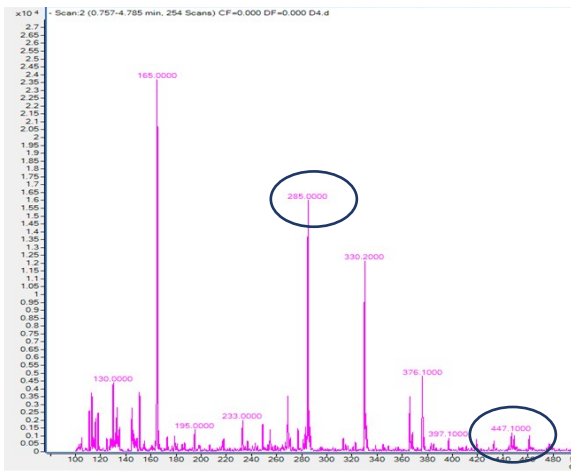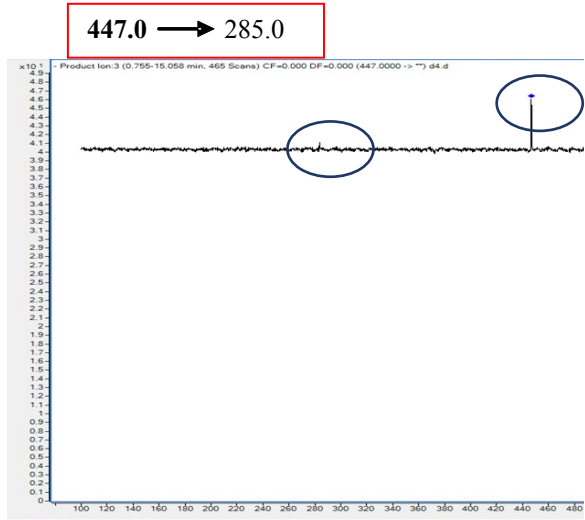

**Fig 4e: MS spectrum of 76E2 glycosylation of fisetin (Full scan) 4f: MS spectrum showing fragmentation of fisetin glucoside (Product ion scan)**

**C) 76E5 Acceptor screening**

**i) Kaempferol**

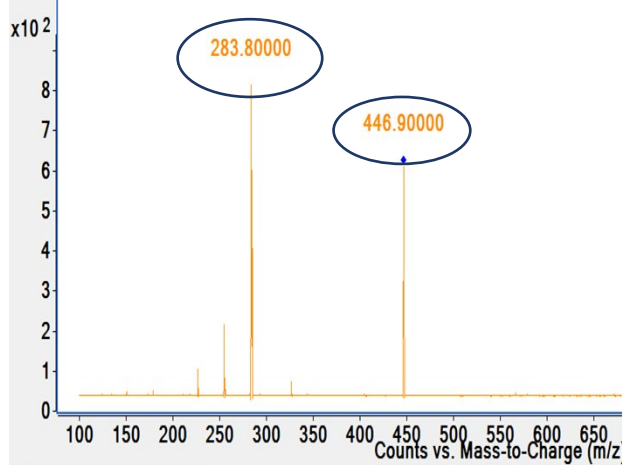

**446.9 -> 283.7**

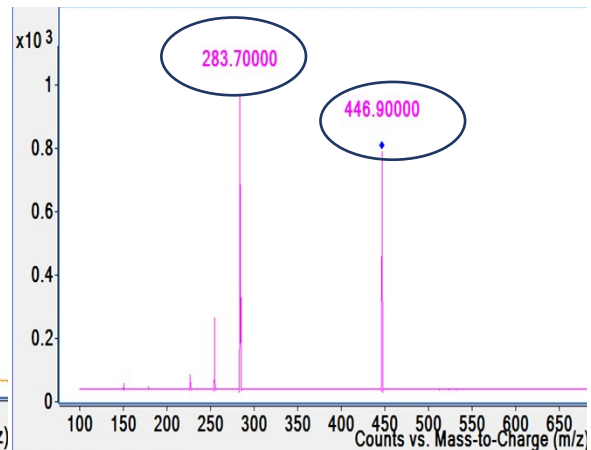

**Fig 5a: MS spectrum of 76E5 glycosylation of kaempferol (Full scan) 5b: MS spectrum showing fragmentation of kaempferol glucoside (Product ion scan)**

**ii) Quercetin**

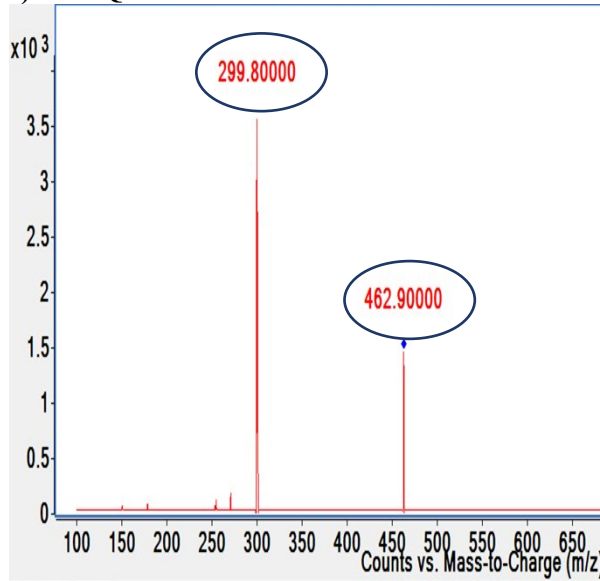

**463.0 -> 299.8**

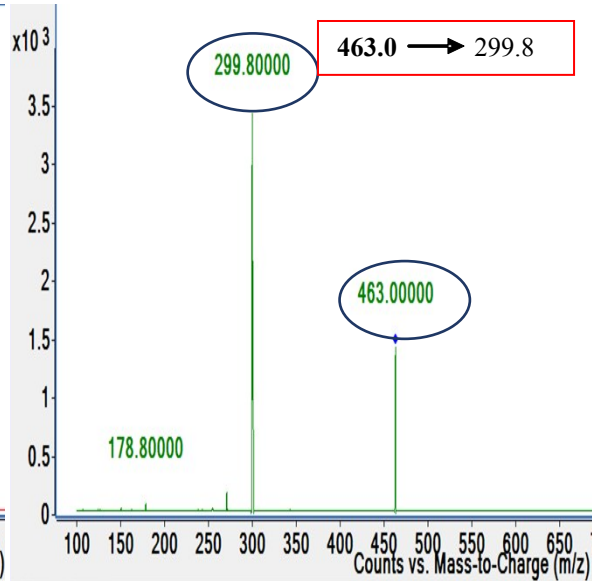

**Fig 5c: MS spectrum of 76E5 glycosylation of quercetin (Full scan) 5d: MS spectrum showing fragmentation of quercetin glucoside (Product ion scan)**

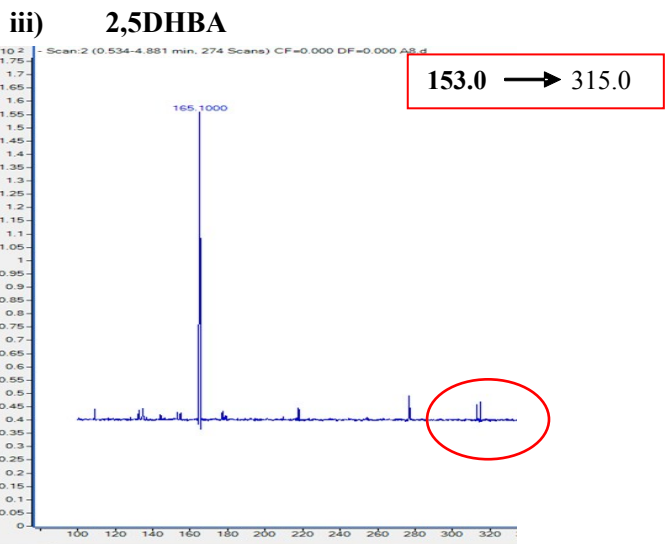

**Fig 5e: MS spectrum of 76E5 glycosylation of 2,5-dihydroxybenzoic acid (Full scan)**

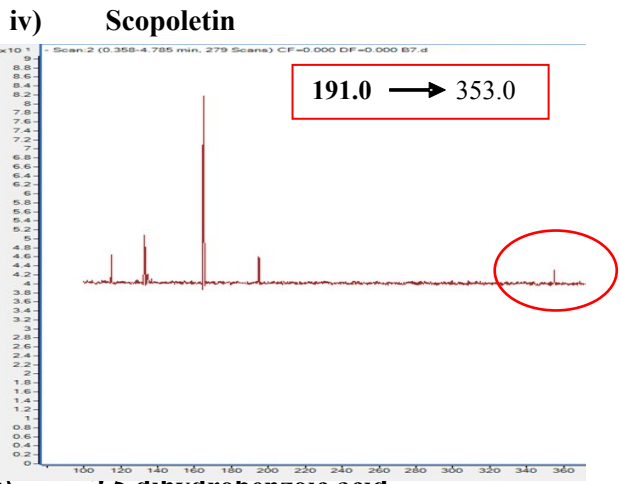

**Fig 5f: MS spectrum of 76E5 glycosylation of scopoletin (Full scan)**

**D) 7**

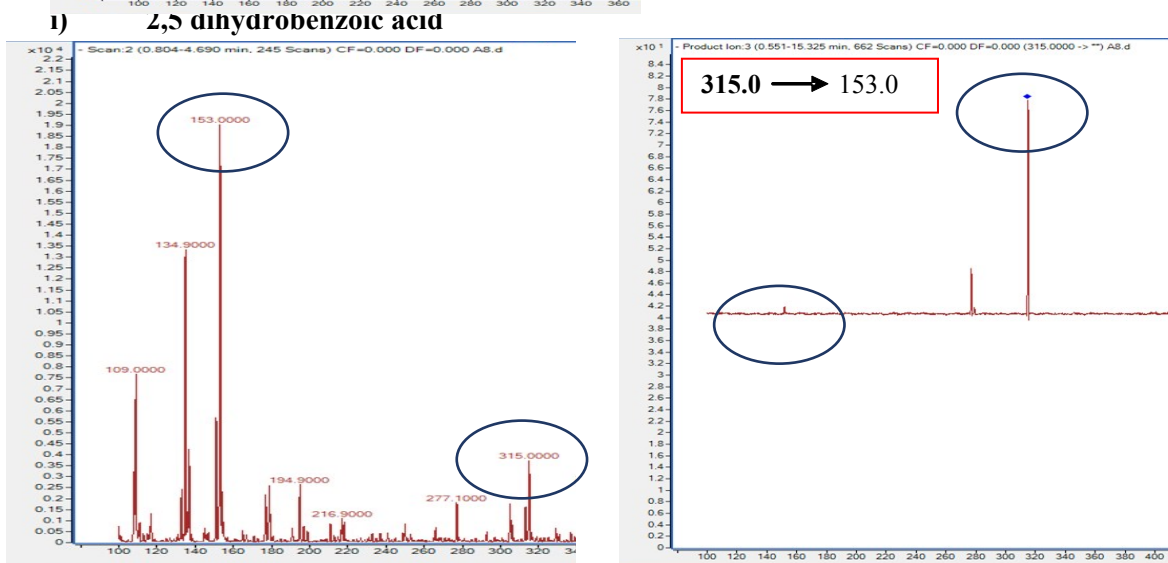

**Fig 6a: MS spectrum of 76E5 glycosylation of 2,5 dihydrobenzoic acid (Full scan) 6b: MS spectrum showing fragmentation of 2,5 dihydrobenzoic acid glucoside (Product ion scan)**

**ii) Quercetin**

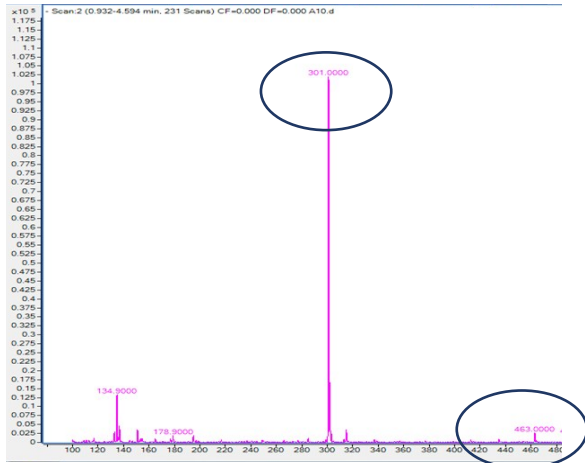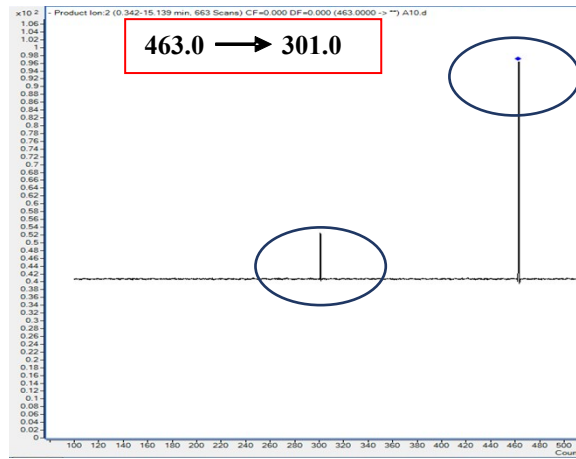

6c: MS spectrum of 76E5 glycosylation of quercetin (Full scan) 6d: MS spectrum showing fragmentation of quercetin glucoside (Product ion scan)

iii) Fisetin

447.0 → 285.0

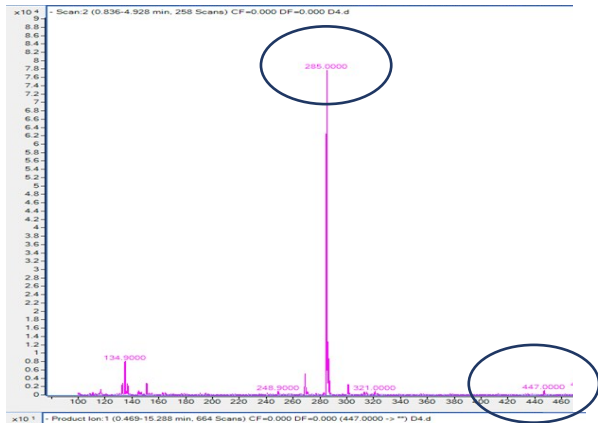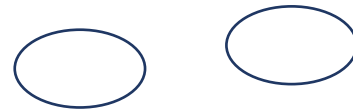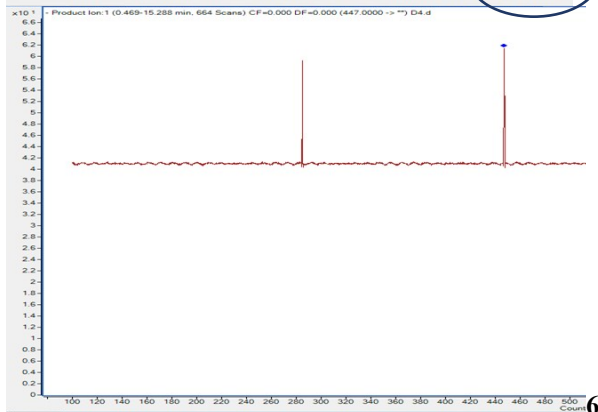

6e: MS spectrum of 76E5 glycosylation of quercetin (Full scan) 6f: MS spectrum showing fragmentation of quercetin glucoside (Product ion scan)

**DONOR SCREENING RESULT AND GLYCOSYLATION POSITION**

**A) 76E1 Donor screening results**

- 1) UDP glucose and Kaempferol

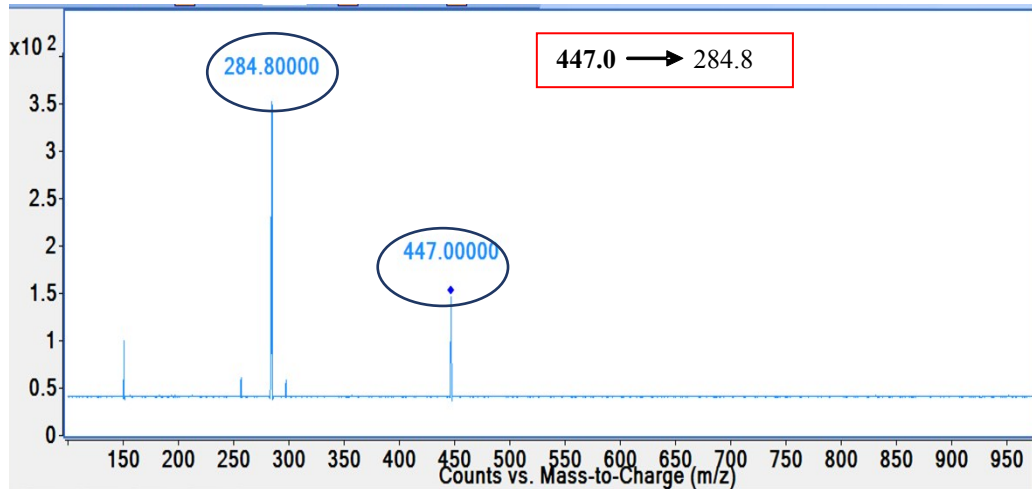

2) UDP galactose and Quercetin

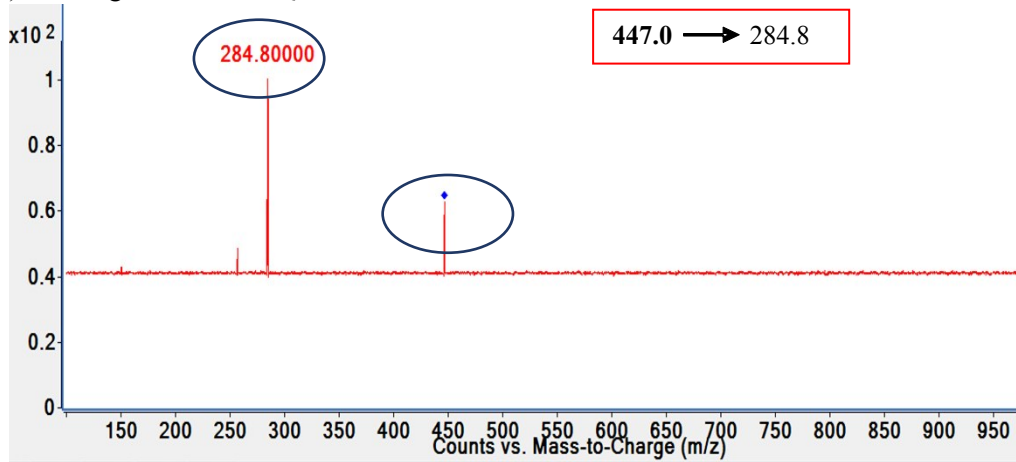

3) UDP glucose and Quercetin

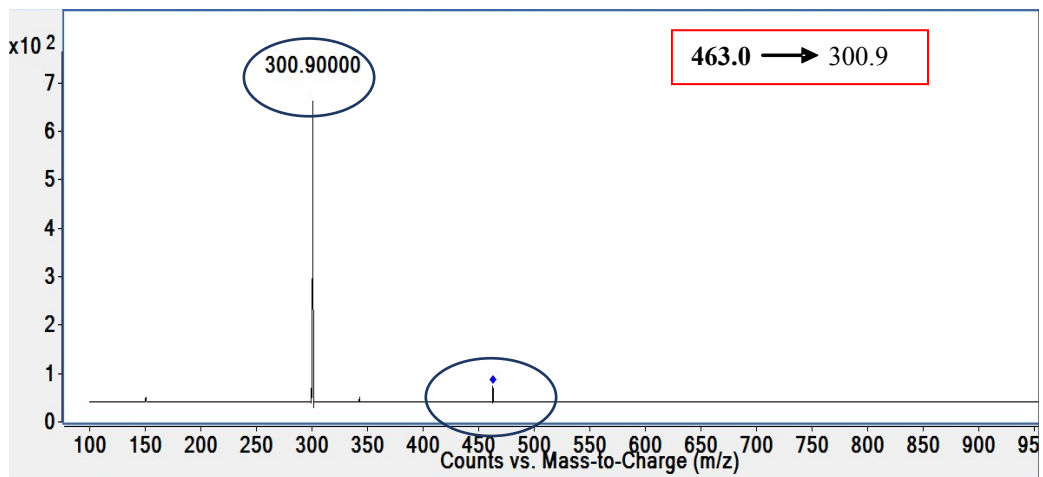

4) UDP glcnac and Quercetin



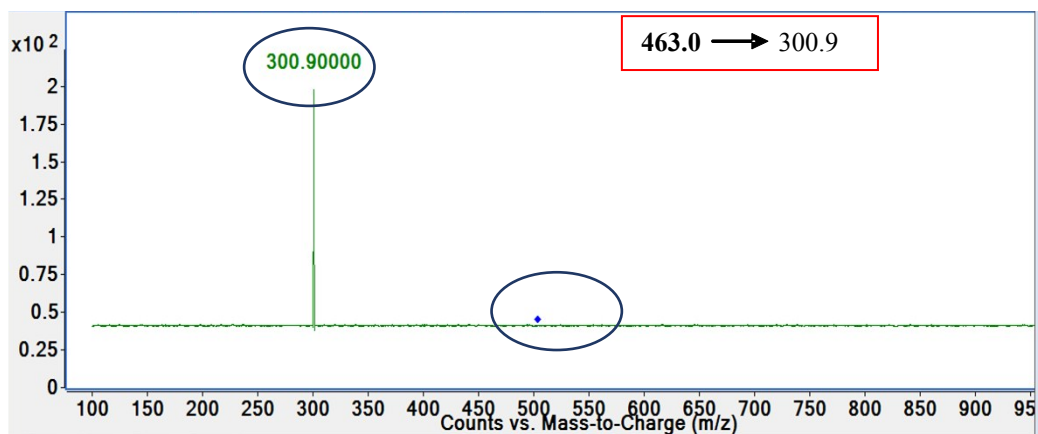

Fig 7: MS spectrum of 76E1 recognition of UDP glc, gal and glcnac

**B) 76E2 Donor screening  
UDP glucose and Quercetin**

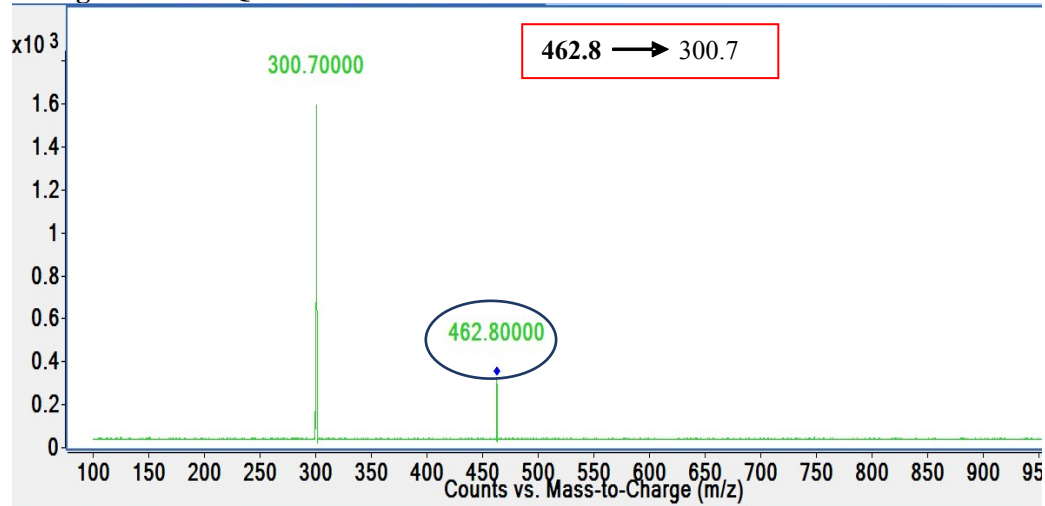

Fig 8: MS spectrum of 76E2 recognition of UDP glc

**C) 76E5 Donor screening  
1) UDP glucose (Kaempferol and Quercetin)**

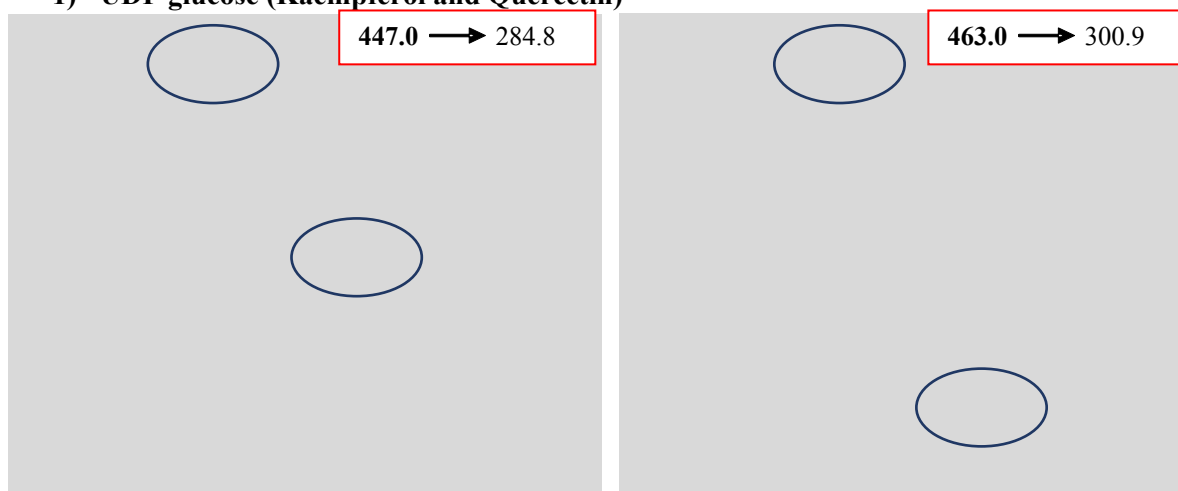

**2) UDP galactose (Kaempferol and Quercetin)**

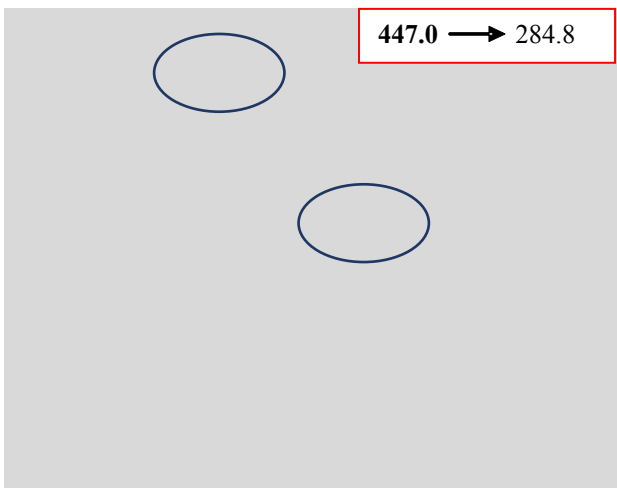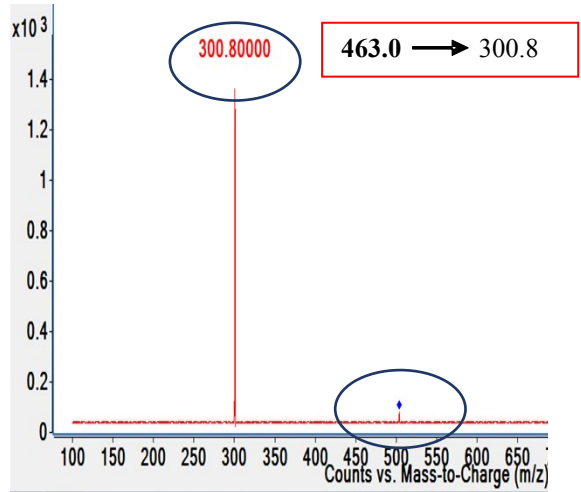

**3) UDP glcnac (Kaempferol and Quercetin)**

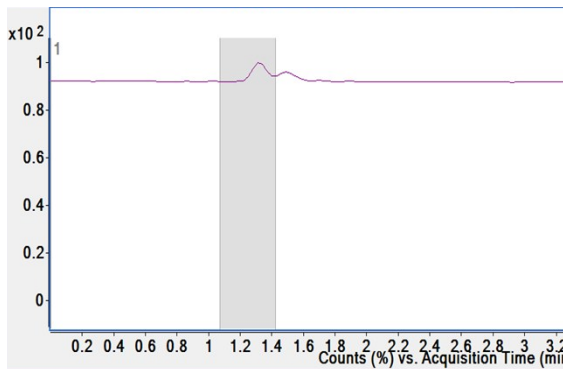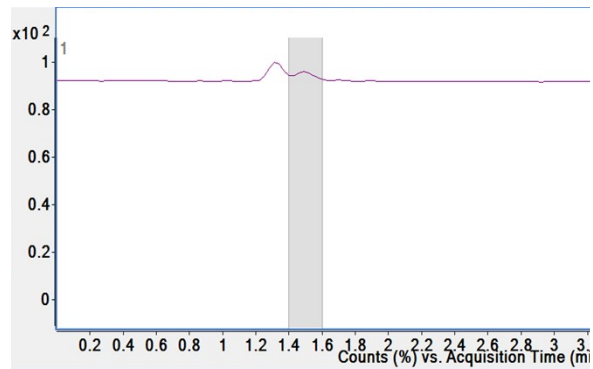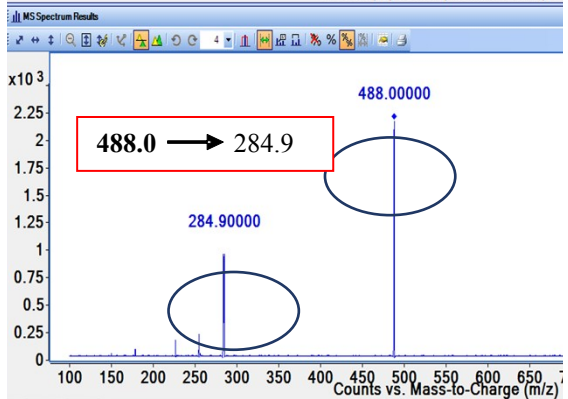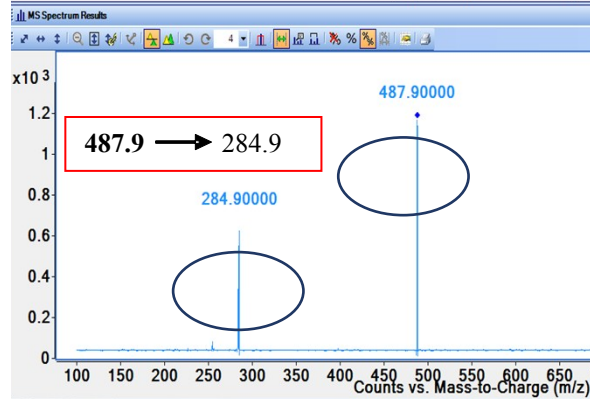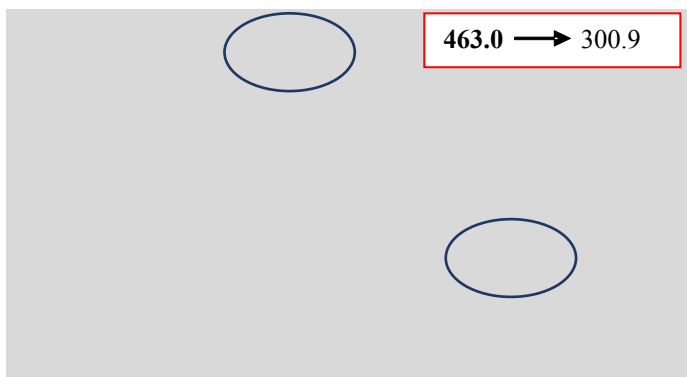

**Fig 9: MS spectrum of 76E5 recognition of UDP glc, gal and glcnac  
D) 76D1 Donor screening**

i) **UDP glucose and Quercetin**

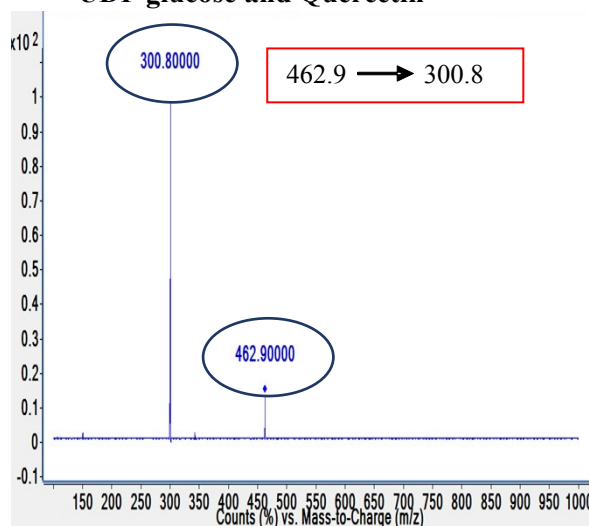

**Fig 10: MS spectrum of 76E5 recognition of UDP glc**

**Table showing m/z of precursor ion and product ion for MS/MS data**

| <b>Enzyme</b> | <b>Reaction</b>          | <b>Precursor ion<br/>(Glycoside peaks)</b> | <b>Product<br/>ion</b> |
|---------------|--------------------------|--------------------------------------------|------------------------|
| 76E1          | UDP Glc/Gal + Kaempferol | <b>447</b>                                 | <b>285</b>             |
|               | UDP Glc + Quercetin      | <b>463</b>                                 | <b>301</b>             |
|               | UDP GlcNAc + Quercetin   | <b>504</b>                                 | <b>301</b>             |
| 76E2          | UDP Glc + Quercetin      | <b>463</b>                                 | <b>301</b>             |
| 76D1          | UDP Glc + Quercetin      | <b>463</b>                                 | <b>301</b>             |
| 76E5          | UDP Glc/Gal + Kaempferol | <b>447</b>                                 | <b>285</b>             |
|               | UDP Glc/Gal + Quercetin  | <b>463</b>                                 | <b>301</b>             |
|               | UDP GlcNAc + Kaempferol  | <b>488</b>                                 | <b>285</b>             |
|               | UDP GlcNAc + Quercetin   | <b>504</b>                                 | <b>301</b>             |
| 76E2 N320S    | UDP Glc/Gal + Kaempferol | <b>447</b>                                 | <b>285</b>             |
|               | UDP Glc/Gal + Quercetin  | <b>463</b>                                 | <b>301</b>             |
|               | UDP GlcNAc + Kaempferol  | <b>488</b>                                 | <b>285</b>             |
|               | UDP GlcNAc + Quercetin   | <b>504</b>                                 | <b>301</b>             |

**Table 2: m/z of precursor and product ions**

## Sanger Sequencing

The sequencing of mutant plasmids was carried out by Source Bioscience to confirm the incorporation of the mutation by template DNAs. The sequence was compared with wild type DNA sequences using NCBI BLAST.

### 76E1 S318N

| Score            | Expect | Identities                                                    | Gaps       | Strand     | Frame |
|------------------|--------|---------------------------------------------------------------|------------|------------|-------|
| 2002 bits(1084)  | 0.0()  | 1092/1098(99%)                                                | 0/1098(0%) | Plus/Minus |       |
| <b>Features:</b> |        |                                                               |            |            |       |
| Query            | 72     | CTACATGAAATTCATCATTTTTTAAGGAATTGACAAAGTTGTCTAATGAGCTGAATGAGGA |            |            | 131   |
| Sbjct            | 1362   | CTACATGAAATTCATCATTTTTTAAGGAATTGACAAAGTTGTCTAATGAGCTGAATGAGGA |            |            | 1303  |
| Query            | 132    | ACCTCTACTCTTGACAGAGGCTTGAAGCTTCTCTTTCAAGTTGATAACTCTCTTCTCAT   |            |            | 191   |
| Sbjct            | 1302   | ACCTCTACTCTTGACAGAGGCTTGAAGCTTCTCTTTCAAGTTGATAACTCTCTTCTCAT   |            |            | 1243  |
| Query            | 192    | TTCTGCTCCTTCTTCATCCATAATCAATCTCTTACAGCTCTCTCCACTGTTCCCTTTATC  |            |            | 251   |
| Sbjct            | 1242   | TTCTGCTCCTTCTTCATCCATAATCAATCTCTTACAGCTCTCTCCACTGTTCCCTTTATC  |            |            | 1183  |
| Query            | 252    | CAGCTCTCCTTCCAATTGAACCCCAATTCCTCAAACCTCTCTCTAAGTACCTCGCATTGAC |            |            | 311   |
| Sbjct            | 1182   | CAGCTCTCCTTCCAATTGAACCCCAATTCCTCAAACCTCTCTCTAAGTACCTCGCATTGAC |            |            | 1123  |
| Query            | 312    | TTTCTGATCTCCCGTAAAAGGCCCTACAGATCATCGGAACTCCTTCCCGGATGCTCTCTAG |            |            | 371   |
| Sbjct            | 1122   | TTTCTGATCTCCCGTAAAAGGCCCTACAGATCATCGGAACTCCTTCCCGGATGCTCTCTAG |            |            | 1063  |
| Query            | 372    | GGTCGAGTTCATCCGAGTGACTCCAAAACCCCTCCACTGCAGGATGTCTGAGAACTTC    |            |            | 431   |
| Sbjct            | 1062   | GGTCGAGTTCATCCGAGTGACTCCAAAACCCCTCCACTGCAGGATGTCTGAGAACTTC    |            |            | 1003  |
| Query            | 432    | TATCTGTGGTGCCCATTTACAATGTAACCTCTTCTGAAACCAACCTATTAAATTCCTC    |            |            | 491   |
| Sbjct            | 1002   | TATCTGTGGTGCCCATTTACAATGTAACCTCTTCTGAAACCAACCTACTAAATTCCTC    |            |            | 943   |
| Query            | 492    | CGGTAAAGACTCTGTCCATTCCGAGCCGGAATAGAACCCTGGTGGATCACCATAAGAA    |            |            | 551   |
| Sbjct            | 942    | CGGTAAAGACTCTGTCCATTCCGAGCCGGAATAGAACCCTGGTGGATCACCATAAGAA    |            |            | 883   |
| Query            | 552    | AGGTTGGTTGCTATTACGTAAACCCCAAGCCATCTCCAACATGTCTTTAGTTTCCATTAG  |            |            | 611   |
| Sbjct            | 882    | AGGTTGGTTGCTATTACGTAAACCCCAAGCCATCTCCAACATGTCTTTAGTTTCCATTAG  |            |            | 823   |
| Query            | 612    | AGCCAAGCTTCCCAAACCTTATGTAAATCACTGAGCCTATTTTTGCTTGTTCACCCTC    |            |            | 671   |
| Sbjct            | 822    | AGCCAAGCTTCCCAAACCTTATGTAAATCACTGAGCCTATTTTTGCTTGTTCACCCTC    |            |            | 763   |
| Query            | 672    | AAGGCAACTCCTGTCTCTTCAAGTAACTAGAAGGCGCTGAAGCTGCAATGTGAAGTGG    |            |            | 731   |
| Sbjct            | 762    | AAGGCAACTCCTGTCTCTTCAAGTAACTAGAAGGCGCTGAAGCTGCAATGTGAAGTGG    |            |            | 703   |
| Query            | 732    | GCCTATAGGATACACTGGAACCTTGCAGTTGTTTTGTAAACCATGCCAAAGATGAGCTCTC |            |            | 791   |
| Sbjct            | 702    | GCCTATAGGATACACTGGAACCTTGCAGTTGTTTTGTAAACCATGCCAAAGATGAGCTCTC |            |            | 643   |
| Query            | 792    | TAGACAGCTTGTGAGTTGATGATAACTGCCGAAGCTGTTCGAATGTTGACAGTCTCACT   |            |            | 851   |
| Sbjct            | 642    | TAGACAGCTTGTGAGTTGATGATAACTGCCGAAGCTGTTCGAATGTTGACAGTCTCACT   |            |            | 583   |
| Query            | 852    | GTAAACCTTGAGTATACTCTCTAATGGCCCAAATGCTGAAGTTGGCAGGTCCTTGTACCT  |            |            | 911   |
| Sbjct            | 582    | GTAAACCTTGAGTATACTCTCTAATGGCCCAAATGCTGAAGTTGGCAGGTCCTTGTACCT  |            |            | 523   |

Fig 11: Query and subject sequence; 76E1 S318N and 76E1 wild type respectively. Codon ATT (reverse AAT) in query is asparagine while ACT (reverse AGT) in subject is serine.

76E5 S311N

| Score           | Expect | Identities                                                    | Gaps       | Strand     | Frame |
|-----------------|--------|---------------------------------------------------------------|------------|------------|-------|
| 2002 bits(1084) | 0.0()  | 1092/1098(99%)                                                | 0/1098(0%) | Plus/Minus |       |
| Features:       |        |                                                               |            |            |       |
| Query           | 72     | CTACATGAAATTCATCATTTTAAAGGAATTGACAAAGTTGTCTAATGAGCTGAATGAGGA  | 131        |            |       |
| Sbjct           | 1362   | CTACATGAAATTCATCATTTTAAAGGAATTGACAAAGTTGTCTAATGAGCTGAATGAGGA  | 1303       |            |       |
| Query           | 132    | ACCTCTACTCTTGACAGAGGCTTGAAGCTTCTCTTTCAAGTTGATAACTCTCTTCCTCAT  | 191        |            |       |
| Sbjct           | 1302   | ACCTCTACTCTTGACAGAGGCTTGAAGCTTCTCTTTCAAGTTGATAACTCTCTTCCTCAT  | 1243       |            |       |
| Query           | 192    | TTCTGCTCCTTCTTCATCCATAATCAATCTCTCTACAGCTCTCTCCACTGTTCCCTTATC  | 251        |            |       |
| Sbjct           | 1242   | TTCTGCTCCTTCTTCATCCATAATCAATCTCTCTACAGCTCTCTCCACTGTTCCCTTATC  | 1183       |            |       |
| Query           | 252    | CAGCTCTCCTTCCAATTGAACCCCAATTCTCCAAACTCTCTCTAAGTACCTCGCATTGAC  | 311        |            |       |
| Sbjct           | 1182   | CAGCTCTCCTTCCAATTGAACCCCAATTCTCCAAACTCTCTCTAAGTACCTCGCATTGAC  | 1123       |            |       |
| Query           | 312    | TTTCTGATCTCCCGTAAAAGGCCTACAGATCATCGGAACTCCTTCCCGGATGCTCTCTAG  | 371        |            |       |
| Sbjct           | 1122   | TTTCTGATCTCCCGTAAAAGGCCTACAGATCATCGGAACTCCTTCCCGGATGCTCTCTAG  | 1063       |            |       |
| Query           | 372    | GGTCGAGTTCCATCOGCAGTGACTCCAAAACCTCCCACTGCAGGATGTCTGAGAACTTC   | 431        |            |       |
| Sbjct           | 1062   | GGTCGAGTTCCATCOGCAGTGACTCCAAAACCTCCCACTGCAGGATGTCTGAGAACTTC   | 1003       |            |       |
| Query           | 432    | TATCTGTGGTGCCCATTTACAATGTAACCTCTTTCTGAAACCAACCATTGAATTCCTC    | 491        |            |       |
| Sbjct           | 1002   | TATCTGTGGTGCCCATTTACAATGTAACCTCTTTCTGAAACCAACCATTGAATTCCTC    | 943        |            |       |
| Query           | 492    | CGGTAAGACTCTGTCCATTCCGAGCCGGGAATAGAACCCTGGGATCAGCCATAAGAA     | 551        |            |       |
| Sbjct           | 942    | CGGTAAGACTCTGTCCATTCCGAGCCGGGAATAGAACCCTGGGATCAGCCATAAGAA     | 883        |            |       |
| Query           | 552    | AGGTTGGTTGCTATTACGTAAACCCCAAGCCATCTCCAACATGTCTTTAGTTTCCATTAG  | 611        |            |       |
| Sbjct           | 882    | AGGTTGGTTGCTATTACGTAAACCCCAAGCCATCTCCAACATGTCTTTAGTTTCCATTAG  | 823        |            |       |
| Query           | 612    | AGCCAAGCTTCCCAAATTTATGTAATCACTGAGCCTATTTTTGCTTGTTCACCCTC      | 671        |            |       |
| Sbjct           | 822    | AGCCAAGCTTCCCAAATTTATGTAATCACTGAGCCTATTTTTGCTTGTTCACCCTC      | 763        |            |       |
| Query           | 672    | AAGGCAACTCCTGTCTCTTCAAGTAACTAGAAGGCGCTGAAGCTGCAATGTGAAGTGG    | 731        |            |       |
| Sbjct           | 762    | AAGGCAACTCCTGTCTCTTCAAGTAACTAGAAGGCGCTGAAGCTGCAATGTGAAGTGG    | 703        |            |       |
| Query           | 732    | GCCTATAGGATACACTGGAACCTTGCAAGTTGTTTTGTAACCATGCCAAAGATGAGCTCTC | 791        |            |       |
| Sbjct           | 702    | GCCTATAGGATACACTGGAACCTTGCAAGTTGTTTTGTAACCATGCCAAAGATGAGCTCTC | 643        |            |       |

Fig 12: Query and subject sequence; 76E5 S311N and 76E5 wild type respectively. Codon ATT (reverse AAT) in query is asparagine while ACT (reverse AGT)in subject is serine.



## 76E2 N320S

| Score            | Expect | Identities                                                    | Gaps       | Strand     | Frame |
|------------------|--------|---------------------------------------------------------------|------------|------------|-------|
| 2023 bits(1095)  | 0.0()  | 1097/1098(99%)                                                | 0/1098(0%) | Plus/Minus |       |
| <b>Features:</b> |        |                                                               |            |            |       |
| Query            | 42     | TCACATGGAATTAACAAAGTCGTCTAGTGAGCTGCATGAGGAACCTCCACTTCTAACAGA  |            |            | 101   |
| Sbjct            | 1350   | TCACATGGAATTAACAAAGTCGTCTAGTGAGCTGCATGAGGAACCTCCACTTCTAACAGA  |            |            | 1291  |
| Query            | 102    | GGTTTCAATCTTTTCTTTCAAGTCAATGGCTCTCTTCTCATTCTGCTCCTTCTTCATC    |            |            | 161   |
| Sbjct            | 1290   | GGTTTCAATCTTTTCTTTCAAGTCAATGGCTCTCTTCTCATTCTGCTCCTTCTTCATC    |            |            | 1231  |
| Query            | 162    | CACAAGCAACCACTCTACAGCTCTCTCCACAGTTTCTTTATCCAGATCTCCCTCCAATTG  |            |            | 221   |
| Sbjct            | 1230   | CACAAGCAACCACTCTACAGCTCTCTCCACAGTTTCTTTATCCAGATCTCCCTCCAATTG  |            |            | 1171  |
| Query            | 222    | AACCCCAATTCTCCAACTCTCTCTAAGTACCTCGCATTGACTTCTGATCCCCGGTGAA    |            |            | 281   |
| Sbjct            | 1170   | AACCCCAATTCTCCAACTCTCTCTAAGTACCTCGCATTGACTTCTGATCCCCGGTGAA    |            |            | 1111  |
| Query            | 282    | AGGCCTACATATCATCGGAACTCCTTCCCCGATGCTCTCTACTGTTGAGTTCATCCACA   |            |            | 341   |
| Sbjct            | 1110   | AGGCCTACATATCATCGGAACTCCTTCCCCGATGCTCTCTACTGTTGAGTTCATCCACA   |            |            | 1051  |
| Query            | 342    | GTGACTCCAAAACCTCCTACTGCAGGATGTCTGAGAACTTCCATCTGCGGAGCCATTT    |            |            | 401   |
| Sbjct            | 1050   | GTGACTCCAAAACCTCCTACTGCAGGATGTCTGAGAACTTCCATCTGCGGAGCCATTT    |            |            | 991   |
| Query            | 402    | CACAATGTAACCTCTTTCTGAAACCAACC ACT AATTCTCTGGTAAGGACTCTGTCCA   |            |            | 461   |
| Sbjct            | 990    | CACAATGTAACCTCTTTCTGAAACCAACC ATT AATTCTCTGGTAAGGACTCTGTCCA   |            |            | 931   |
| Query            | 462    | TTCTGACCCCGGAATAGAGCCCGGTCTGACCACCATAAGAAAGGTTGGTTGCTATTACT   |            |            | 521   |
| Sbjct            | 930    | TTCTGACCCCGGAATAGAGCCCGGTCTGACCACCATAAGAAAGGTTGGTTGCTATTACT   |            |            | 871   |
| Query            | 522    | TAATCCCAAGCCATCTCCAACATGTCTTTGGTGTCCATTAGAGCCAAGCTTCCAAGCT    |            |            | 581   |
| Sbjct            | 870    | TAATCCCAAGCCATCTCCAACATGTCTTTGGTGTCCATTAGAGCCAAGCTTCCAAGCT    |            |            | 811   |
| Query            | 582    | TATGTAATAAAGTGAATTTGATTTTGTCTGTTCAACCACTCAACGCAACTCCTGTCTTC   |            |            | 641   |
| Sbjct            | 810    | TATGTAATAAAGTGAATTTGATTTTGTCTGTTCAACCACTCAACGCAACTCCTGTCTTC   |            |            | 751   |
| Query            | 642    | TTCTAGTAAACTAGAAAGCGCTGAAGCTGTAATATGAAGTGGGCCATAGGATACACCGG   |            |            | 701   |
| Sbjct            | 750    | TTCTAGTAAACTAGAAAGCGCTGAAGCTGTAATATGAAGTGGGCCATAGGATACACCGG   |            |            | 691   |
| Query            | 702    | AACTTGCAAGTTGTTGTTGCAACCTTGCCAAAGATGAGCTCTCTAACAGCTTGCTGAGTT  |            |            | 761   |
| Sbjct            | 690    | AACTTGCAAGTTGTTGTTGCAACCTTGCCAAAGATGAGCTCTCTAACAGCTTGCTGAGTT  |            |            | 631   |
| Query            | 762    | GATGATAACAGCGGAAGCTGTTTCGAGTGTTCACAGTCTCACTGTAAACCTTGAGCGTACT |            |            | 821   |
| Sbjct            | 630    | GATGATAACAGCGGAAGCTGTTTCGAGTGTTCACAGTCTCACTGTAAACCTTGAGCGTACT |            |            | 571   |
| Query            | 822    | CTCTATTGGCCCAAATACTGAAGTTGGTAGATCCTTGTACCTCAGAGGATGCAACCTGG   |            |            | 881   |
| Sbjct            | 570    | CTCTATTGGCCCAAATACTGAAGTTGGTAGATCCTTGTACCTCAGAGGATGCAACCTGG   |            |            | 511   |
| Query            | 882    | AAATACTTTGTCTTGTGTTTCAGGATCTTTTCATGTCGATCAAGAACGACTCTGCGTTGAC |            |            | 941   |
| Sbjct            | 510    | AAATACTTTGTCTTGTGTTTCAGGATCTTTTCATGTCGATCAAGAACGACTCTGCGTTGAC |            |            | 451   |
| Query            | 942    | TCTAGACAAAACAGAGCGACAGACAAAAGCAGTAGCACTTGTCTGCTAAAGACGACACT   |            |            | 1001  |
| Sbjct            | 450    | TCTAGACAAAACAGAGCGACAGACAAAAGCAGTAGCACTTGTCTGCTAAAGACGACACT   |            |            | 391   |
| Query            | 1002   | AGGAAGTTGAAACTCTTTTACTGCAGCATGAGAGAAGTACATGTACTCATCGTAGACGAC  |            |            | 1061  |
| Sbjct            | 390    | AGGAAGTTGAAACTCTTTTACTGCAGCATGAGAGAAGTACATGTACTCATCGTAGACGAC  |            |            | 331   |

**Fig 13: Query and subject sequence; 76E2 N320S and 76E2 wild type respectively. Codon ACT (reverse AGT) in query is serine while ATT (reverse AAT) in subject is asparagine.**

**WILD TYPE SEQUENCING**  
**76E5**

| Score          | Expect                                                       | Identities    | Gaps      | Strand     |
|----------------|--------------------------------------------------------------|---------------|-----------|------------|
| 1539 bits(833) | 0.0                                                          | 833/833(100%) | 0/833(0%) | Plus/Minus |
| Query 31       | TCAAGTATTTCTATACTCTGCCTCCAAGTAATGGACGAGCTCATCCAATGCATTGTATGA |               |           | 90         |
| Sbjct 1344     | TCAAGTATTTCTATACTCTGCCTCCAAGTAATGGACGAGCTCATCCAATGCATTGTATGA |               |           | 1285       |
| Query 91       | AGAGCCTCCACTTCTTACAGAGGCATTGAGCTTCTCTTTTAAAACAAGGGCTCTCTCCCT |               |           | 150        |
| Sbjct 1284     | AGAGCCTCCACTTCTTACAGAGGCATTGAGCTTCTCTTTTAAAACAAGGGCTCTCTCCCT |               |           | 1225       |
| Query 151      | CATTCTACACCTTCATCATCCACAATCAACCTCTTACAGCTCTCTCTACACATCCTCT   |               |           | 210        |
| Sbjct 1224     | CATTCTACACCTTCATCATCCACAATCAACCTCTTACAGCTCTCTCTACACATCCTCT   |               |           | 1165       |
| Query 211      | CTCCACTTCTCCTTGAAGCAGAACCCTACTCTCCAAACACTTTCTATATACATCGCGTT  |               |           | 270        |
| Sbjct 1164     | CTCCACTTCTCCTTGAAGCAGAACCCTACTCTCCAAACACTTTCTATATACATCGCGTT  |               |           | 1105       |
| Query 271      | TAACTTCTGCTCACCGTTAAACGGTCTGCAAATCATTGGAACCTCCTCCACAATACTCTC |               |           | 330        |
| Sbjct 1104     | TAACTTCTGCTCACCGTTAAACGGTCTGCAAATCATTGGAACCTCCTCCACAATACTCTC |               |           | 1045       |
| Query 331      | GAGTGTGAGTTCCATCCACAGTGGCTCCAGAAACCTCCCACTGCAGGATGCACAAGTAC  |               |           | 390        |
| Sbjct 1044     | GAGTGTGAGTTCCATCCACAGTGGCTCCAGAAACCTCCCACTGCAGGATGCACAAGTAC  |               |           | 985        |
| Query 391      | TTCATTCTGTGGCGCCATTTTACAATGCATCCTCTTTCCGAGACAATCTTACTGACTTC  |               |           | 450        |
| Sbjct 984      | TTCATTCTGTGGCGCCATTTTACAATGCATCCTCTTTCCGAGACAATCTTACTGACTTC  |               |           | 925        |
| Query 451      | CACTGGCATTGACTCTGTACCGGGTCGGATTACCCATAGAAAAGGTTGGTTGCTATTATA |               |           | 510        |
| Sbjct 924      | CACTGGCATTGACTCTGTACCGGGTCGGATTACCCATAGAAAAGGTTGGTTGCTATTATA |               |           | 865        |
| Query 511      | CAATCCCCAAGCCATCTCCAATACTTCCTTGGTTTCCATGTGAGCTATGCTTCCTACGCT |               |           | 570        |
| Sbjct 864      | CAATCCCCAAGCCATCTCCAATACTTCCTTGGTTTCCATGTGAGCTATGCTTCCTACGCT |               |           | 805        |
| Query 571      | TATGTATATAACTGACCTCAGTTTCTGCTTGTTCAGCCATTCAATGCAGCTCCTGTCTC  |               |           | 630        |
| Sbjct 804      | TATGTATATAACTGACCTCAGTTTCTGCTTGTTCAGCCATTCAATGCAGCTCCTGTCTC  |               |           | 745        |
| Query 631      | TTCAAGTAAACTAAAATTTGCTGAAGTTGTAATGTGAAGAGGGCCTAATGGATACACTGG |               |           | 690        |
| Sbjct 744      | TTCAAGTAAACTAAAATTTGCTGAAGTTGTAATGTGAAGAGGGCCTAATGGATACACTGG |               |           | 685        |
| Query 691      | AATACTGAGTTCTTGTTCAGCCATGACAGAGACGAGCTCTCTAGACAACCTTGACGTATT |               |           | 750        |
| Sbjct 684      | AATACTGAGTTCTTGTTCAGCCATGACAGAGACGAGCTCTCTAGACAACCTTGACGTATT |               |           | 625        |
| Query 751      | GATTATAACAGCGGAAGCTGTTCTTTTGTGACAACTTCGGCACAAATCTCCAAAAATCG  |               |           | 810        |
| Sbjct 624      | GATTATAACAGCGGAAGCTGTTCTTTTGTGACAACTTCGGCACAAATCTCCAAAAATCG  |               |           | 565        |
| Query 811      | CTCTAGCGGCCCATTCCTGAAGTTGGTAAGTCTTTGTATTTTAGTGGATGTA         |               |           | 863        |
| Sbjct 564      | CTCTAGCGGCCCATTCCTGAAGTTGGTAAGTCTTTGTATTTTAGTGGATGTA         |               |           | 512        |

**Fig 14: Query and subject sequence; 76E5 recombinant plasmid and 76E5 sequence on database respectively.**



76E2

| Score           | Expect                                                        | Identities      | Gaps       | Strand     |
|-----------------|---------------------------------------------------------------|-----------------|------------|------------|
| 1934 bits(1047) | 0.0                                                           | 1047/1047(100%) | 0/1047(0%) | Plus/Minus |
| Query 50        | TCACATGGAATTAACAAAGTCGTCTAGTGAGCTGCATGAGGAACCTCCACTTCTAACAGA  | 109             |            |            |
| Sbjct 1350      | TCACATGGAATTAACAAAGTCGTCTAGTGAGCTGCATGAGGAACCTCCACTTCTAACAGA  | 1291            |            |            |
| Query 110       | GGTTTCAATCTTTTCTTTCAAGTCAATGGCTCTCTTCCTCATTCTGTCCTTCTTCATC    | 169             |            |            |
| Sbjct 1290      | GGTTTCAATCTTTTCTTTCAAGTCAATGGCTCTCTTCCTCATTCTGTCCTTCTTCATC    | 1231            |            |            |
| Query 170       | CACAAGCAACCACTCTACAGCTCTCTCCACAGTTTCTTTATCCAGATCTCCCTCCAATTG  | 229             |            |            |
| Sbjct 1230      | CACAAGCAACCACTCTACAGCTCTCTCCACAGTTTCTTTATCCAGATCTCCCTCCAATTG  | 1171            |            |            |
| Query 230       | AACCCCAATTCTCCAAACTCTCTTAAGTACCTCGCATTGACTTTCTGATCCCGGTGAA    | 289             |            |            |
| Sbjct 1170      | AACCCCAATTCTCCAAACTCTCTTAAGTACCTCGCATTGACTTTCTGATCCCGGTGAA    | 1111            |            |            |
| Query 290       | AGGCTACATATCATCGGAACTCCTTCCCGATGCTCTCTACTGTTGAGTTCCATCCACA    | 349             |            |            |
| Sbjct 1110      | AGGCTACATATCATCGGAACTCCTTCCCGATGCTCTCTACTGTTGAGTTCCATCCACA    | 1051            |            |            |
| Query 350       | GTGACTCCAAAACCTCCTACTGCAGGATGTCTGAGAACTTCCATCTGCGGAGCCCATT    | 409             |            |            |
| Sbjct 1050      | GTGACTCCAAAACCTCCTACTGCAGGATGTCTGAGAACTTCCATCTGCGGAGCCCATT    | 991             |            |            |
| Query 410       | CACAAATGTAACCTCTTTCTGAAACCAACCTATTGAATTCCTCTGGTAAGGACTCTGTCCA | 469             |            |            |
| Sbjct 990       | CACAAATGTAACCTCTTTCTGAAACCAACCTATTGAATTCCTCTGGTAAGGACTCTGTCCA | 931             |            |            |
| Query 470       | TTCTGACCCCGGAATAGAGCCCGTCTGACCACCCATAAGAAAGGTTGGTTGCTATTACT   | 529             |            |            |
| Sbjct 930       | TTCTGACCCCGGAATAGAGCCCGTCTGACCACCCATAAGAAAGGTTGGTTGCTATTACT   | 871             |            |            |
| Query 530       | TAATCCCCAAGCCATCTCCAACATGTCTTTGGTGTCCATTAGAGCCAAGCTTCCCAAGCT  | 589             |            |            |
| Sbjct 870       | TAATCCCCAAGCCATCTCCAACATGTCTTTGGTGTCCATTAGAGCCAAGCTTCCCAAGCT  | 811             |            |            |
| Query 590       | TATGTAAATAACTGAATTTGATTTTGTCTGTTCAACCACTCAACGCAACTCCTGTCTTC   | 649             |            |            |
| Sbjct 810       | TATGTAAATAACTGAATTTGATTTTGTCTGTTCAACCACTCAACGCAACTCCTGTCTTC   | 751             |            |            |
| Query 650       | TTCTAGTAAACTAGAAAGCGCTGAAGCTGTAATATGAAGTGGGCTATAGGATACACCGG   | 709             |            |            |
| Sbjct 750       | TTCTAGTAAACTAGAAAGCGCTGAAGCTGTAATATGAAGTGGGCTATAGGATACACCGG   | 691             |            |            |
| Query 710       | AACTTGCAGTTGTTGTTGCAACCTTGCCAAAGATGAGCTCTCTAAACAGCTTGCTGAGTT  | 769             |            |            |
| Sbjct 690       | AACTTGCAGTTGTTGTTGCAACCTTGCCAAAGATGAGCTCTCTAAACAGCTTGCTGAGTT  | 631             |            |            |
| Query 770       | GATGATAACAGCGGAAGCTGTTTCGAGTGTTCACAGTCTCACTGTAAACCTTGAGCGTACT | 829             |            |            |
| Sbjct 630       | GATGATAACAGCGGAAGCTGTTTCGAGTGTTCACAGTCTCACTGTAAACCTTGAGCGTACT | 571             |            |            |
| Query 830       | CTCTATTGGCCCAAATACTGAAGTTGGTAGATCCTTGTACCTCAGAGGATGCAACCCTGG  | 889             |            |            |
| Sbjct 570       | CTCTATTGGCCCAAATACTGAAGTTGGTAGATCCTTGTACCTCAGAGGATGCAACCCTGG  | 511             |            |            |

Fig 15: Query and subject sequence; 76E2 recombinant plasmid and 76E2 sequence on database respectively.



## 76D1

| Score          | Expect | Identities                                                     | Gaps      | Strand     |
|----------------|--------|----------------------------------------------------------------|-----------|------------|
| 1157 bits(626) | 0.0    | 626/626(100%)                                                  | 0/626(0%) | Plus/Minus |
| Query 13       |        | TCATTGTTTCGTC AATTTGCATCATTATTGCATGGACCAAATTGTTTAAAGAATTGTGAGA |           | 72         |
| Sbjct 1359     |        | TCATTGTTTCGTC AATTTGCATCATTATTGCATGGACCAAATTGTTTAAAGAATTGTGAGA |           | 1300       |
| Query 73       |        | AGAGCCTTCGGTTGTGACAGAGGCTTCAACCTCTTCCTTCAATATGGTGGCTCTCATTCT   |           | 132        |
| Sbjct 1299     |        | AGAGCCTTCGGTTGTGACAGAGGCTTCAACCTCTTCCTTCAATATGGTGGCTCTCATTCT   |           | 1240       |
| Query 133      |        | CATCTCCTGACCTTCTTGATCCACAATGAGCCTCCTCACGGCCATCTCAACAGCTCCTCT   |           | 192        |
| Sbjct 1239     |        | CATCTCCTGACCTTCTTGATCCACAATGAGCCTCCTCACGGCCATCTCAACAGCTCCTCT   |           | 1180       |
| Query 193      |        | TTCCAATTACCTTCGATCTCATAACGGGTTTGCCAAACATGTGACATAAGTCGAGTATT    |           | 252        |
| Sbjct 1179     |        | TTCCAATTACCTTCGATCTCATAACGGGTTTGCCAAACATGTGACATAAGTCGAGTATT    |           | 1120       |
| Query 253      |        | CACCCCTCTGATCACCAGAATACGGCCTACAAATCATTGGTACACCCTGCTTATGCTCTC   |           | 312        |
| Sbjct 1119     |        | CACCCCTCTGATCACCAGAATACGGCCTACAAATCATTGGTACACCCTGCTTATGCTCTC   |           | 1060       |
| Query 313      |        | CAAGCACGAGTTCCATCCACCATGGTTCCAAAACCTCCCACTGCTCTATGCCTTAATAC    |           | 372        |
| Sbjct 1059     |        | CAAGCACGAGTTCCATCCACCATGGTTCCAAAACCTCCCACTGCTCTATGCCTTAATAC    |           | 1000       |
| Query 373      |        | CTCTTTTGTGGGGCCCATTTACAACAAAACCTCTTCCATCGGTACCCGTTTGGTTGAA     |           | 432        |
| Sbjct 999      |        | CTCTTTTGTGGGGCCCATTTACAACAAAACCTCTTCCATCGGTACCCGTTTGGTTGAA     |           | 940        |
| Query 433      |        | CTGTTCCGGTAAGAAGTCTAAAGATTCTTGTCCGTTTATAGAGCCTGGTCGGATCACCCA   |           | 492        |
| Sbjct 939      |        | CTGTTCCGGTAAGAAGTCTAAAGATTCTTGTCCGTTTATAGAGCCTGGTCGGATCACCCA   |           | 880        |
| Query 493      |        | CAAGAAGGGTTGATTACTCTGGACAAATCCCATGGCCATCTCCACAGCCTCTATATCTTG   |           | 552        |
| Sbjct 879      |        | CAAGAAGGGTTGATTACTCTGGACAAATCCCATGGCCATCTCCACAGCCTCTATATCTTG   |           | 820        |
| Query 553      |        | TGTCATCGCCAAGCTCCCCATGCTTATGTAGATCACTGAGCTTGTCTTCTGCTTCTCAAG   |           | 612        |
| Sbjct 819      |        | TGTCATCGCCAAGCTCCCCATGCTTATGTAGATCACTGAGCTTGTCTTCTGCTTCTCAAG   |           | 760        |
| Query 613      |        | CCATTCAAGACAGTTTCTTTCTTCTT 638                                 |           |            |
| Sbjct 759      |        | CCATTCAAGACAGTTTCTTTCTTCTT 734                                 |           |            |

**Fig 16: Query and subject sequence; 76D1 recombinant plasmid and 76D1 sequence on database respectively.**

## 76E1

```
Query 71 CTACATGAAATTCATCA TTTT AAGGAAT TGACAAAGTTGCTAATGAGCTGAATGAGGA 130
Sbjct 1362 CTACATGAAATTCATCA TTTT AAGGAAT TGACAAAGTTGCTAATGAGCTGAATGAGGA 1303
Query 131 ACCTCTACTCTTGACAGAGGCTTGAAGCTTCTCTTCAAGTTGATAACTCTCTTCTCAT 190
Sbjct 1302 ACCTCTACTCTTGACAGAGGCTTGAAGCTTCTCTTCAAGTTGATAACTCTCTTCTCAT 1243
Query 191 TTCTGCTCCTTCTTCATCCATAATCAATCTCTACAGCTCTCTCCACTGTTCCCTTATC 250
Sbjct 1242 TTCTGCTCCTTCTTCATCCATAATCAATCTCTACAGCTCTCTCCACTGTTCCCTTATC 1183
Query 251 CAGCTCTCCTTCCAATTGAACCCCAATTCCTCAAACCTCTCTAAGTACCTCGCATTGAC 310
Sbjct 1182 CAGCTCTCCTTCCAATTGAACCCCAATTCCTCAAACCTCTCTAAGTACCTCGCATTGAC 1123
Query 311 TTTCTGATCTCCCGTAAAAGGCTACAGATCATCGGAACTCCTTCCCGATGCTCTCTAG 370
Sbjct 1122 TTTCTGATCTCCCGTAAAAGGCTACAGATCATCGGAACTCCTTCCCGATGCTCTCTAG 1063
Query 371 GGTGAGTTCATCCGAGTACTCCAAAACCTCCCACTGCAGGATGCTGAGAACTTC 430
Sbjct 1062 GGTGAGTTCATCCGAGTACTCCAAAACCTCCCACTGCAGGATGCTGAGAACTTC 1003
Query 431 TATCTGTGGTGCCCATTCACAATGTAACTCTTCTGAAACCAACCTACTGAATTCCTC 490
Sbjct 1002 TATCTGTGGTGCCCATTCACAATGTAACTCTTCTGAAACCAACCTACTGAATTCCTC 943
Query 491 CGGTAAAGACTCTGTCCATTCGAGCCGGGAATAGAACCCTGGATCACCCATAAGAA 550
Sbjct 942 CGGTAAAGACTCTGTCCATTCGAGCCGGGAATAGAACCCTGGATCACCCATAAGAA 883
Query 551 AGGTGGTGTGCTATTACGTAACCCCAAGCCATCTCAACATGCTTTAGTTCCATTAG 610
Sbjct 882 AGGTGGTGTGCTATTACGTAACCCCAAGCCATCTCAACATGCTTTAGTTCCATTAG 823
Query 611 AGCCAAGCTTCCCAAACCTATGTAANTCACTGAGCCTATTTTTGCTTGTCAACCACTC 670
Sbjct 822 AGCCAAGCTTCCCAAACCTATGTAANTCACTGAGCCTATTTTTGCTTGTCAACCACTC 763
Query 671 AAGGCAACTCCTGTCTCTTCAAGTAAACTAGAANGCGCTGAAGCTGCAATGTGAAGTGG 730
Sbjct 762 AAGGCAACTCCTGTCTCTTCAAGTAAACTAGAANGCGCTGAAGCTGCAATGTGAAGTGG 703
Query 731 GCCTATAGGATACACTGGAAC TTGCAAGTTGTTTTGTAAACCATGCCAAAGATGANCTCTC 790
Sbjct 702 GCCTATAGGATACACTGGAAC TTGCAAGTTGTTTTGTAAACCATGCCAAAGATGAGCTCTC 643
Query 791 TAGACAGCTTGN TGAGTTGATGATAACTGCCGAANCTGN TCNAATGNTGACAGTCTCACT 850
Sbjct 642 TAGACAGCTTGN TGAGTTGATGATAACTGCCGAAGCTGTCGAA TGTGACAGTCTCACT 583
```

**Fig 17: Query and subject sequence; 76E1 recombinant plasmid and 76E1 sequence on database respectively.**

# MUTAGENESIS EXPERIMENTS - MASS SPECTRA

## 76E2 N320S DONOR SCREEN (New activity)

### UDP Galactose + Kaempferol

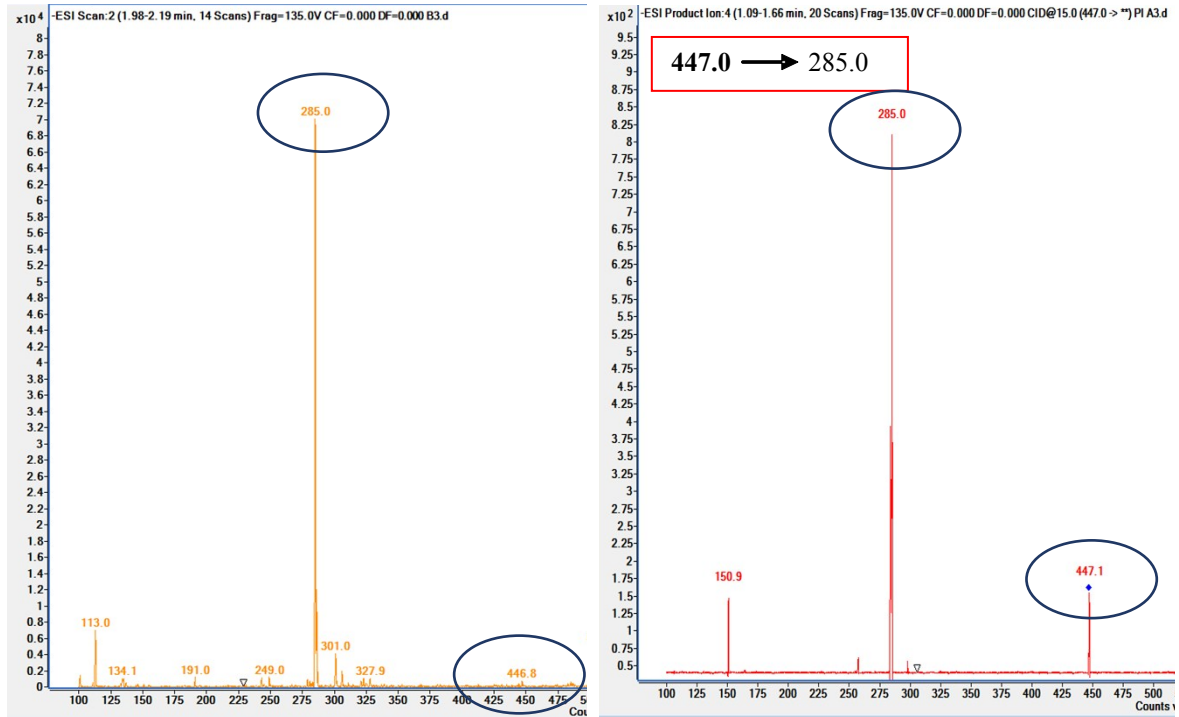

Fig 18a: MS spectrum of 76E2 N320S glycosylation of kaempferol (Full scan) 18b: MS spectrum showing fragmentation of kaempferol galactoside (Product ion scan)

### UDP Galactose + Quercetin

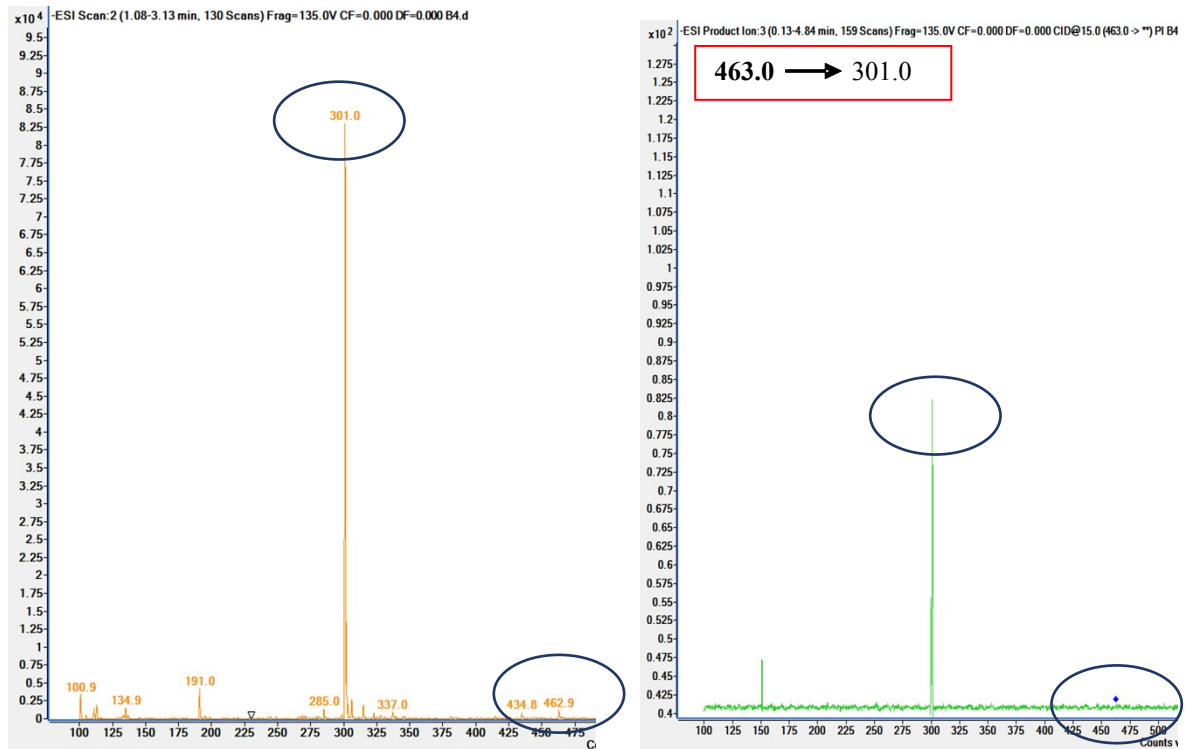

Fig 19a: MS spectrum of 76E2 N320S glycosylation of quercetin (Full scan) 19b: MS spectrum showing fragmentation of quercetin galactoside (Product ion scan)

### UDP GlcNAc + Kaempferol

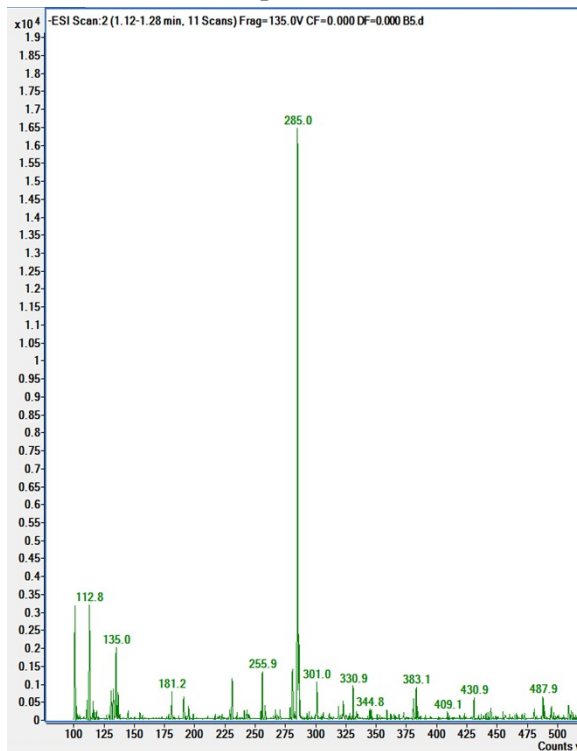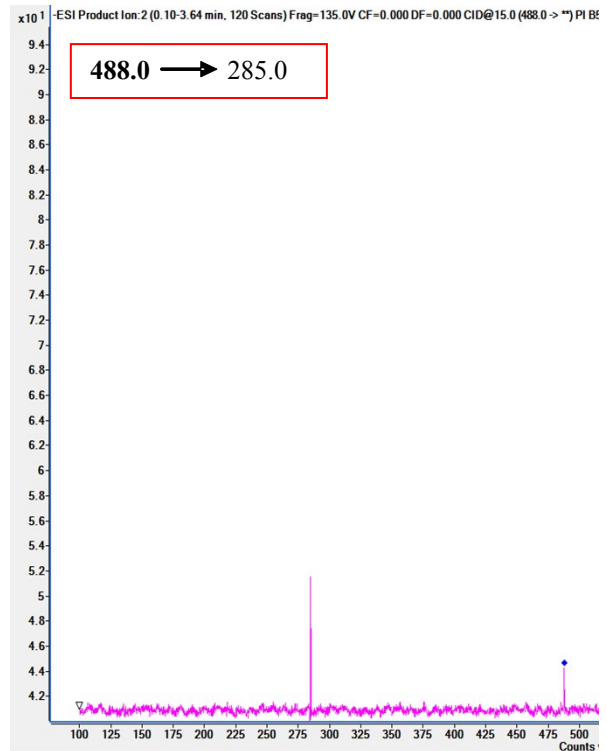

Fig 20a: MS spectrum of 76E2 N320S glycosylation of kaempferol (Full scan) 20b: MS spectrum showing fragmentation of kaempferol glycoside (Product ion scan)

### UDP GlcNAc + Quercetin

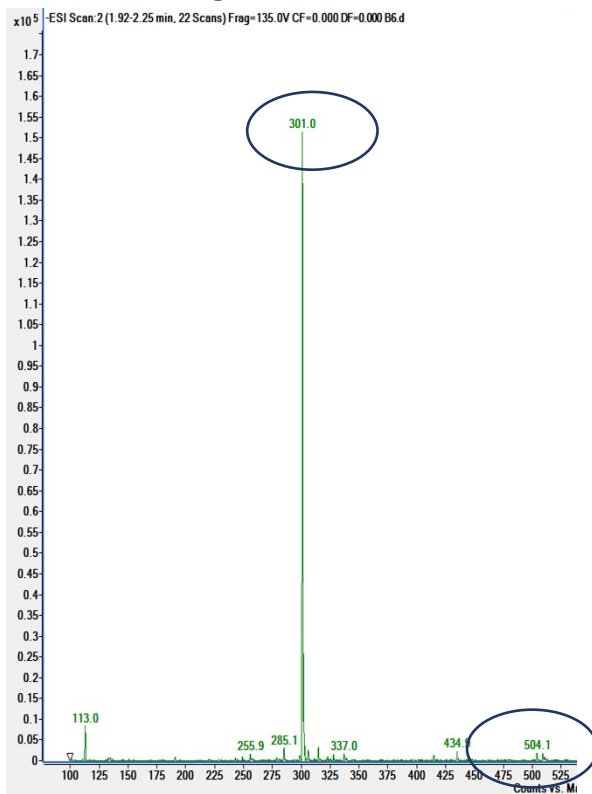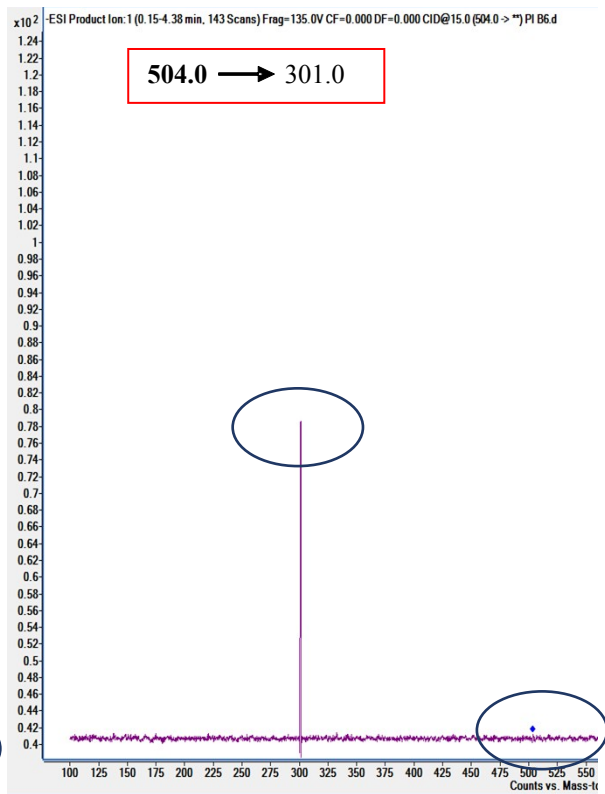

Fig 21a: MS spectrum of 76E2 N320S glycosylation of quercetin (Full scan) 21b: MS spectrum showing fragmentation of quercetin glycoside (Product ion scan)



### UDP Glucose + Kaempferol

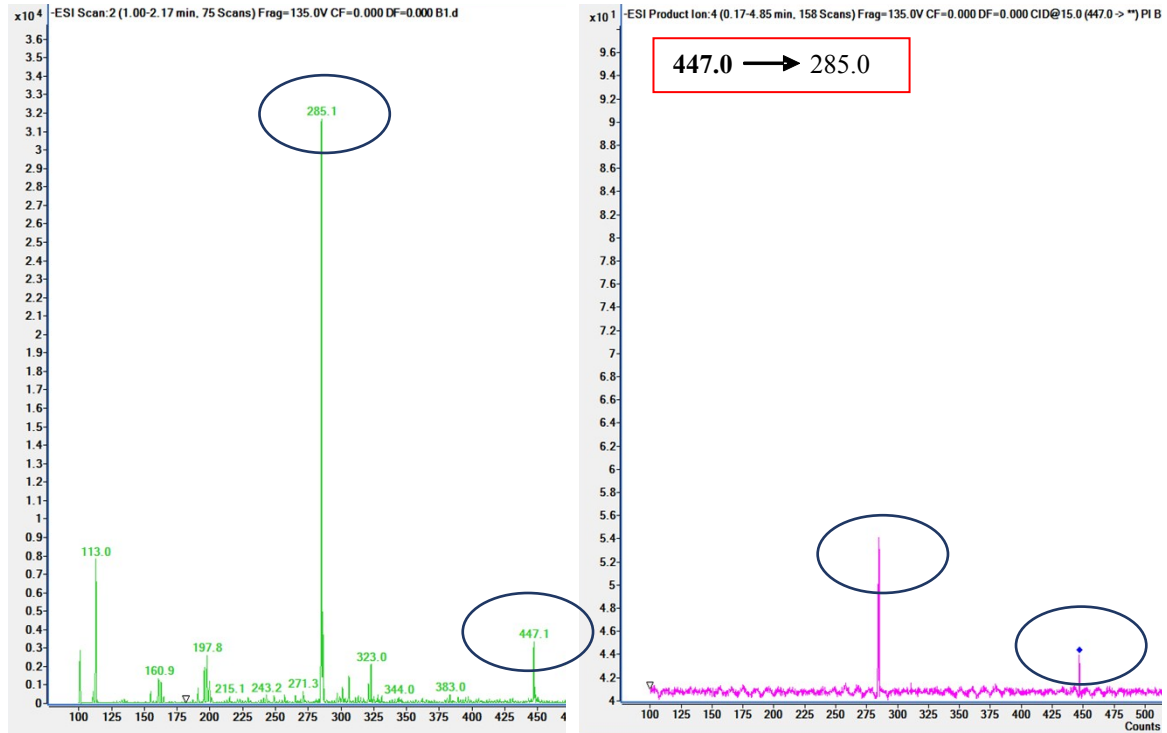

Fig 22a: MS spectrum of 76E2 N320S glycosylation of kaempferol (Full scan) 22b: MS spectrum showing fragmentation of kaempferol glucoside (Product ion scan)

### UDP Glucose + Quercetin

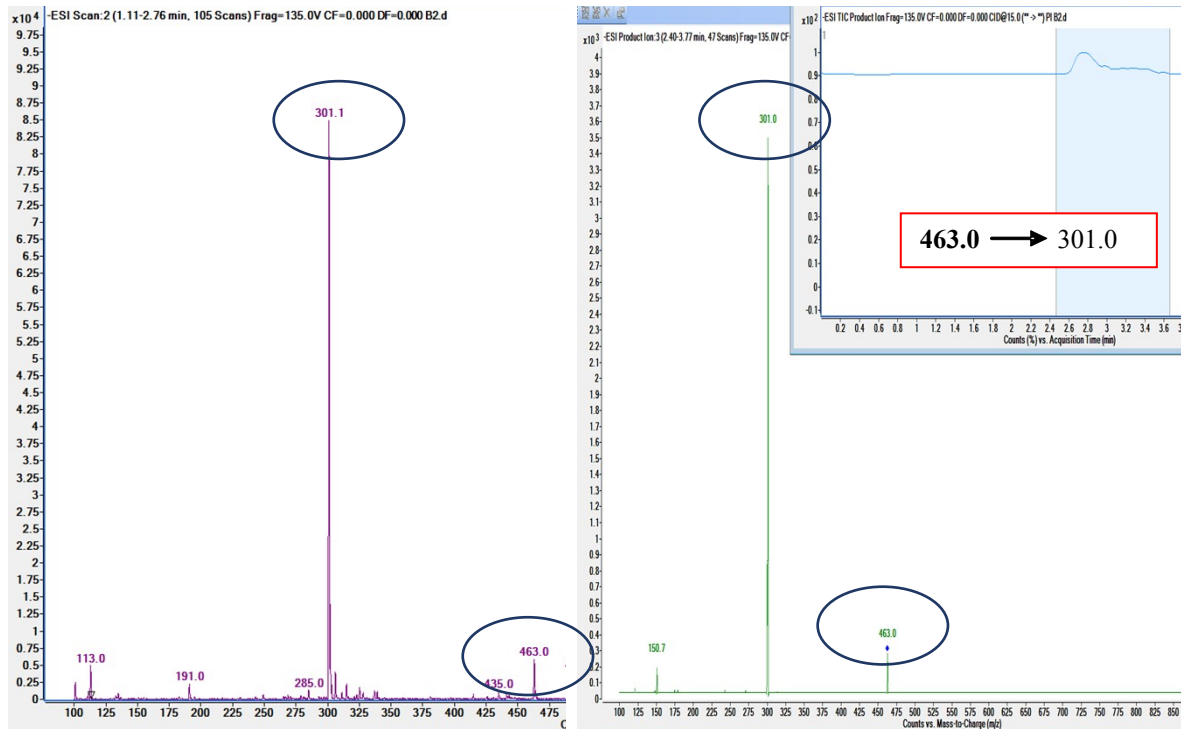

Fig 23a: MS spectrum of 76E2 N320S glycosylation of quercetin (Full scan) 23b: MS spectrum showing fragmentation of quercetin glucoside (Product ion scan)

## 76E1 S318N and 76E5 S311N DONOR SCREEN (Loss of activity)

### UDP Glucose + Kaempferol

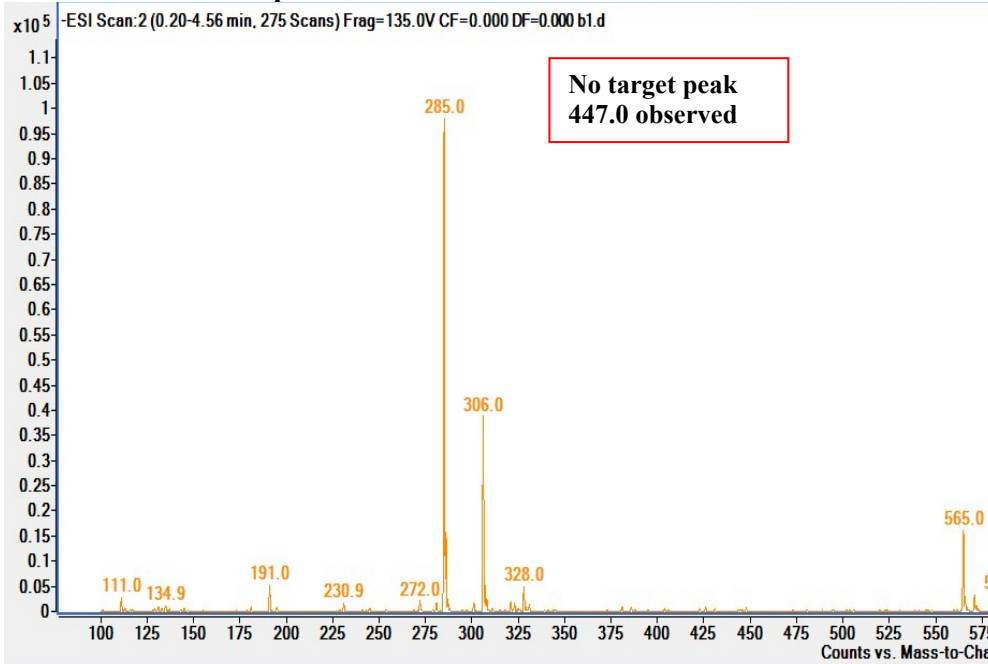

Fig 24a: MS spectrum of asparagine mutants showing no glycosylation with kaempferol (Product ion scan)

### UDP Glucose + Quercetin

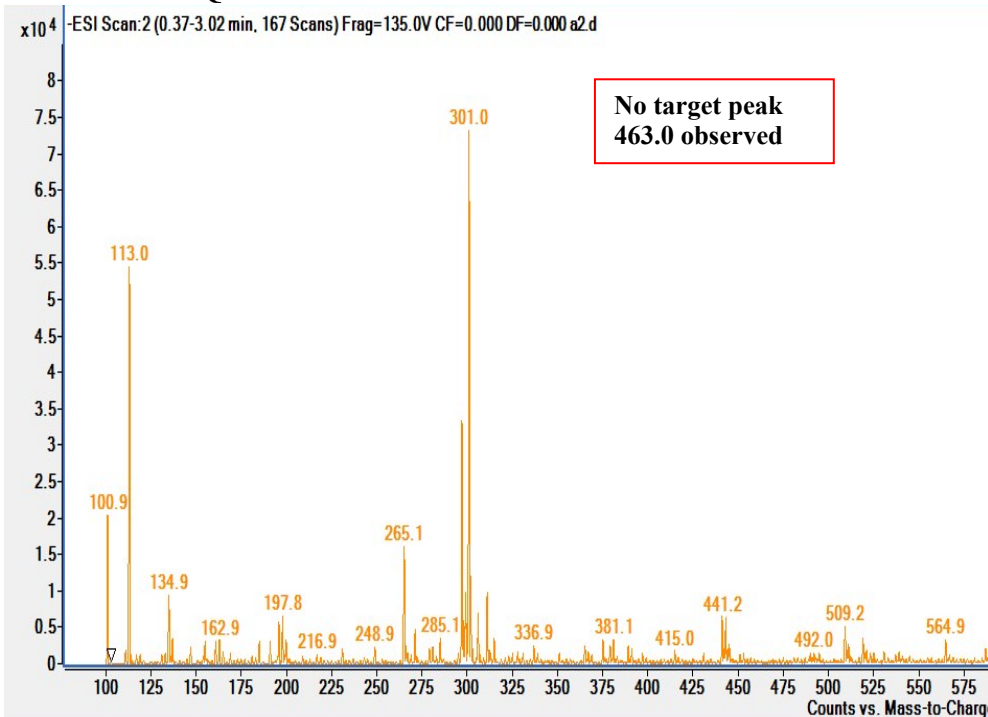

Fig 24b: MS spectrum of asparagine mutants showing no glycosylation with quercetin (Product ion scan)

### UDP Galactose + Quercetin

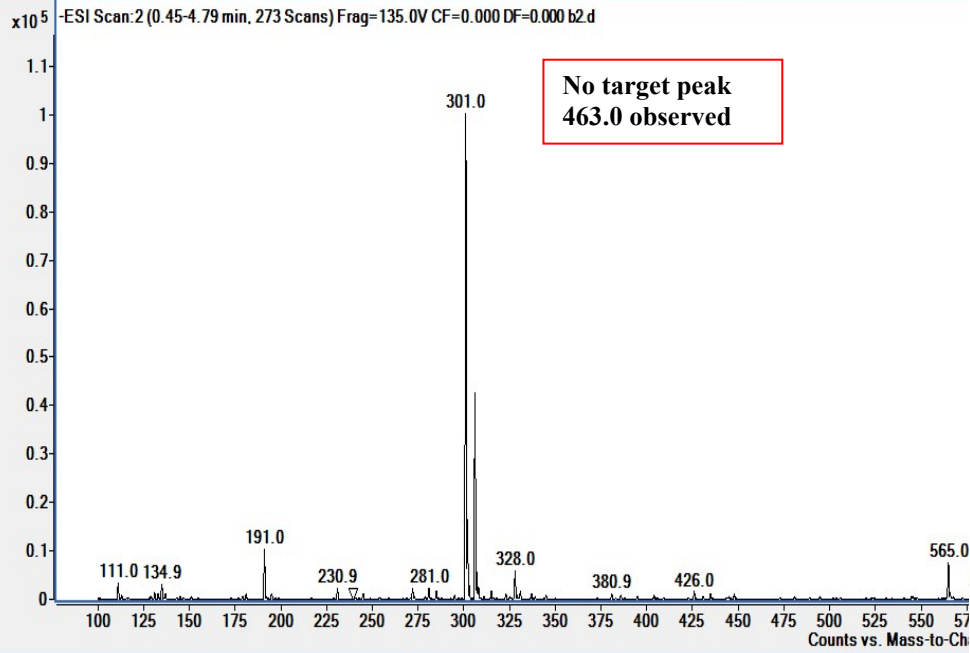

Fig 24c: MS spectrum of asparagine mutants showing no glycosylation with quercetin (Product ion scan)

### UDP Galactose + Kaempferol

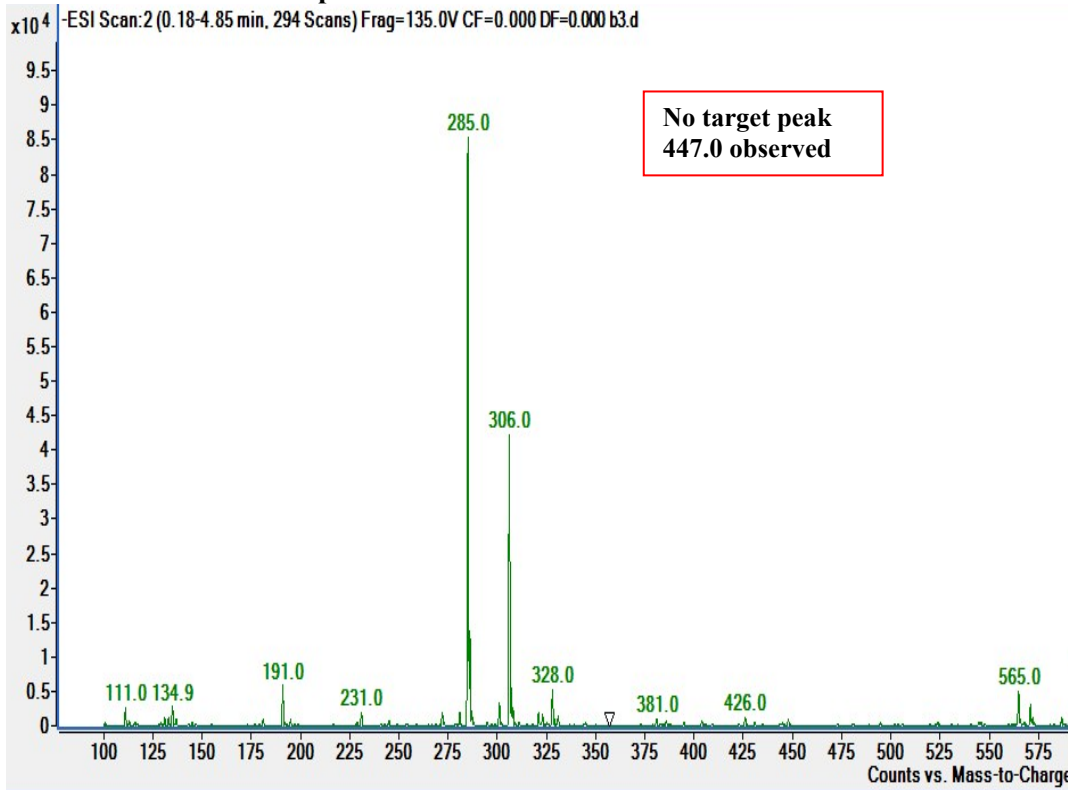

Fig 24d: MS spectrum of asparagine mutants showing no glycosylation with kaempferol (Product ion scan)

### UDP GlcNAc + Kaempferol

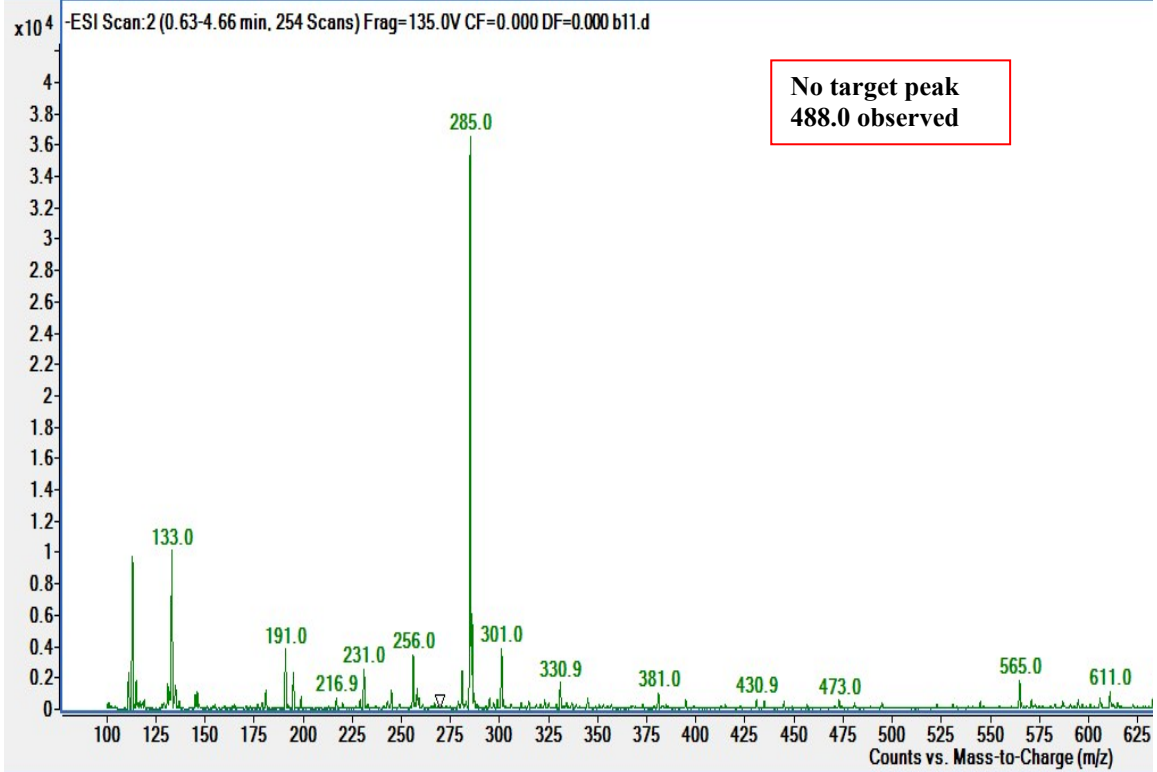

Fig 24c: MS spectrum of asparagine mutants showing no glycosylation with kaempferol (Product ion scan)

### UDP GlcNAc + Quercetin

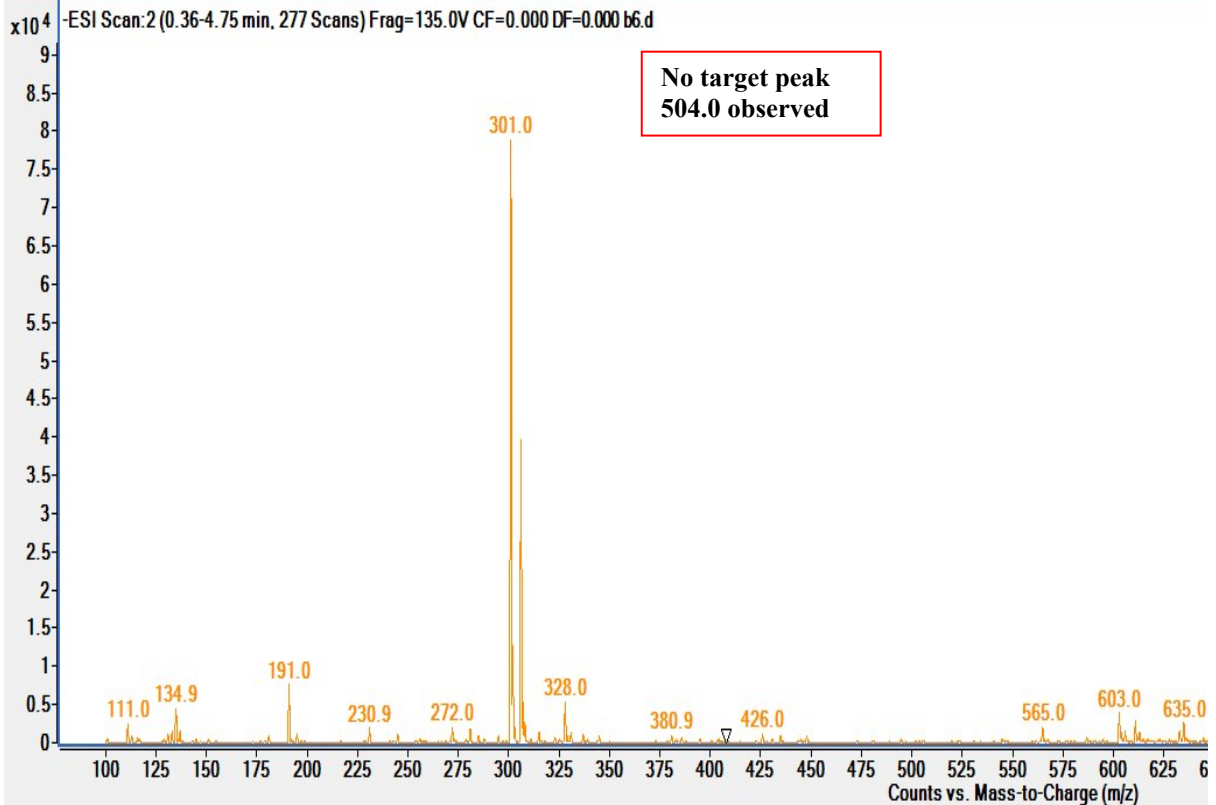

Fig 24f: MS spectrum of asparagine mutants showing no glycosylation with quercetin (Product ion scan)



# MALDI-TOF CONFIRMATION OF PROTEIN EXPRESSION

## 1. 76E5

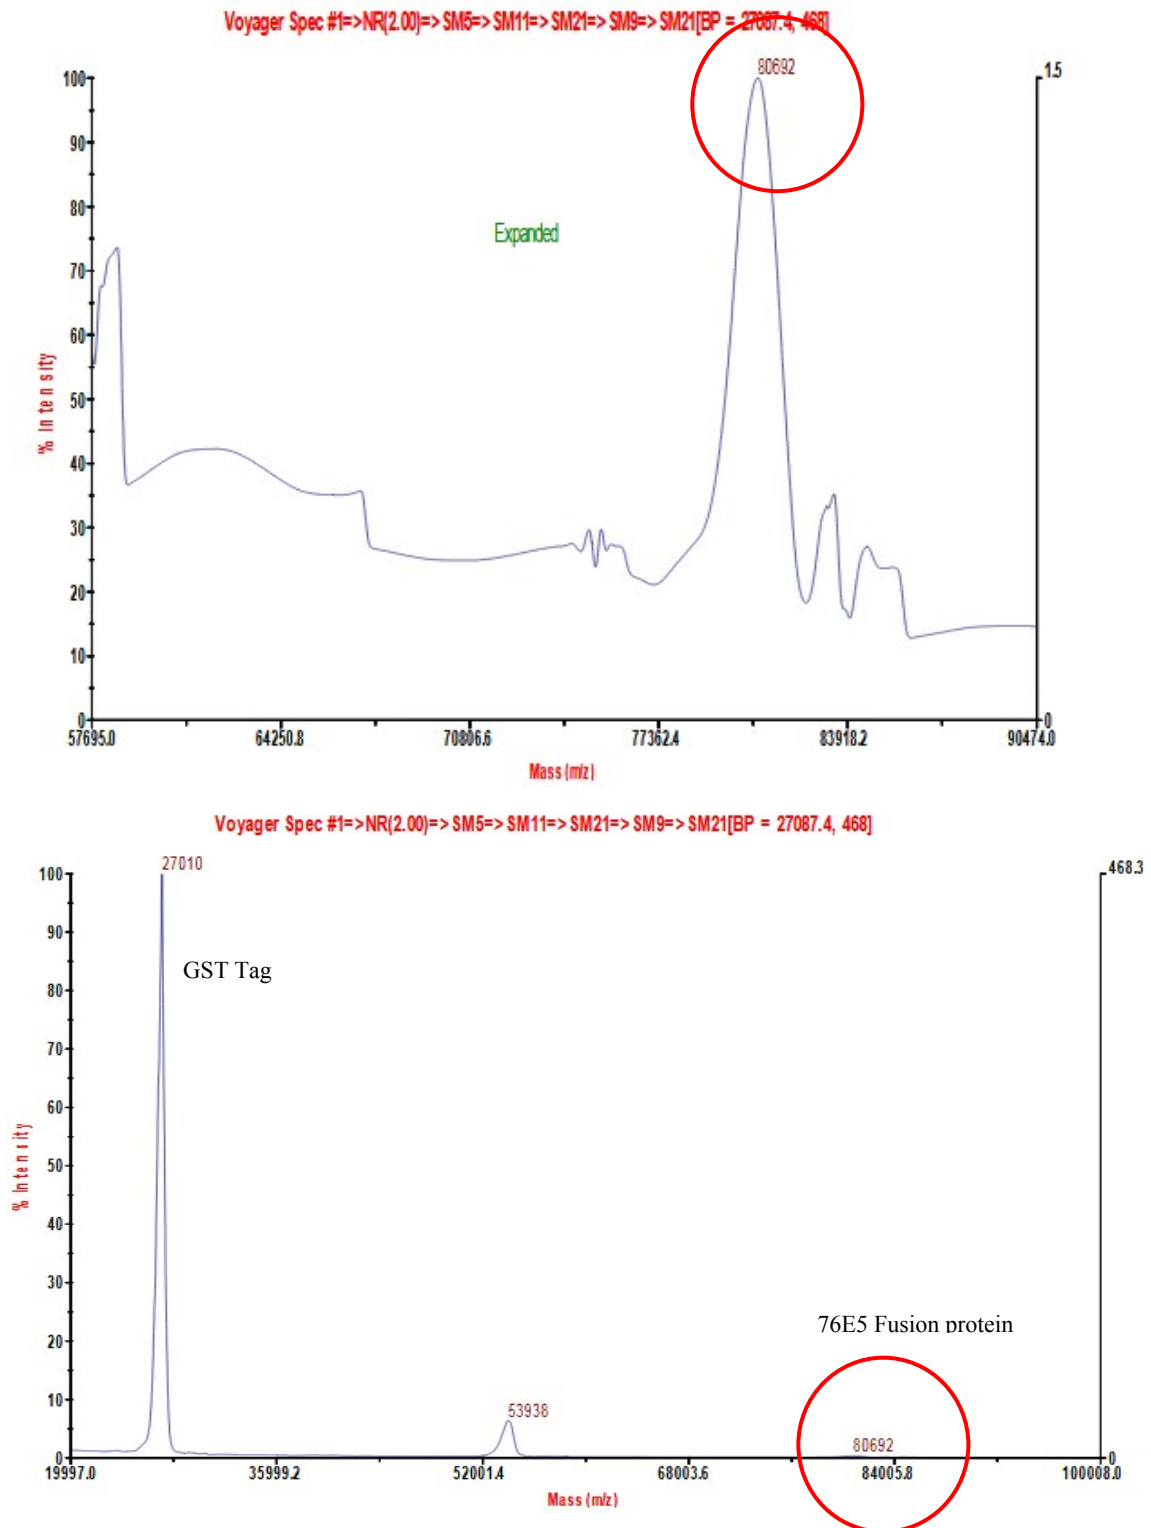

|   |       |       |       |   |     |     |        |
|---|-------|-------|-------|---|-----|-----|--------|
| 1 | 27010 | 24999 | 28185 | 0 | 468 | 100 | 559778 |
| 2 | 53938 | 51124 | 55511 | 0 | 30  | 6   | 44166  |
| 3 | 80692 | 79919 | 81429 | 0 | 2   | 0   | 595    |

Fig 25: MALDI spectrum to confirm protein expression

The empirical determination of 76E5 molecular weight (using our sequenced DNA data, was converted into protein sequence and lastly used to calculate the weight) was determined. This was confirmed by the MALDI-TOF data, 80.69kda.

<https://web.expasy.org/translate/> (DNA sequence conversion to protein sequence)

[https://www.bioinformatics.org/sms/prot\\_mw.html](https://www.bioinformatics.org/sms/prot_mw.html) (protein sequence changed to molecular weight)

## KINETICS DATA

### 1) 76E1 UDP GLUCOSE

#### Michaelis menten plot

| S(uM) | V (uM/min) |
|-------|------------|
| 0     | 0          |
| 10    | 0.0032     |
| 20    | 0.0042     |
| 50    | 0.0058     |
| 100   | 0.006      |
| 200   | 0.0064     |
| 500   | 0.0065     |

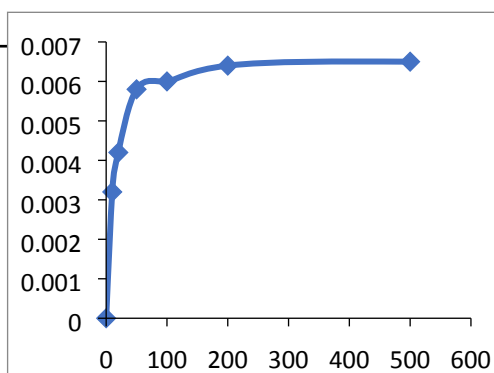

#### Lineweaver Burk

| 1/S   | 1/V      |
|-------|----------|
| 0.1   | 312.5    |
| 0.05  | 238.0952 |
| 0.02  | 172.4138 |
| 0.01  | 166.6667 |
| 0.005 | 156.25   |
| 0.002 | 153.8462 |

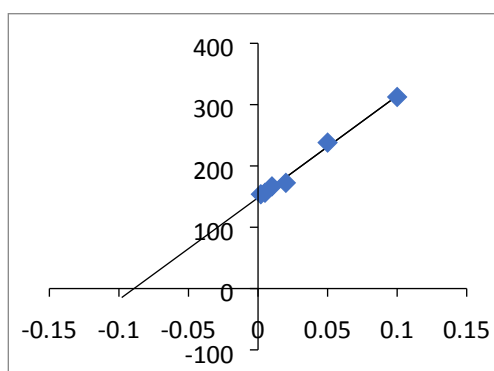

**K<sub>m</sub>** 10.5 ± 1.38 μM

**k<sub>cat</sub>/K<sub>M</sub>** 0.79 s<sup>-1</sup>mM<sup>-1</sup>

**k<sub>cat</sub>** 0.00832 s<sup>-1</sup>

Fig 26: Michaelis menten and Lineweaver-Burk plots for 76E1

## 2) 76E2 UDP GLUCOSE

### Michaelis menten plot

| S (uM) | V (uM/min) |
|--------|------------|
| 0      | 0          |
| 10     | 0.0048     |
| 20     | 0.0064     |
| 50     | 0.0073     |
| 100    | 0.0076     |
| 200    | 0.0084     |
| 500    | 0.0084     |

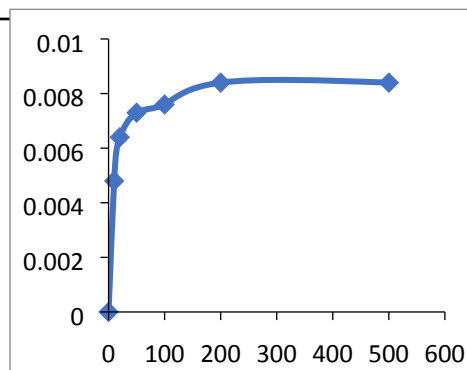

### Lineweaver Burk

| 1/S   | 1/V      |
|-------|----------|
| 0.1   | 208.3333 |
| 0.05  | 156.25   |
| 0.02  | 136.9863 |
| 0.01  | 131.5789 |
| 0.005 | 119.0476 |
| 0.002 | 119.0476 |

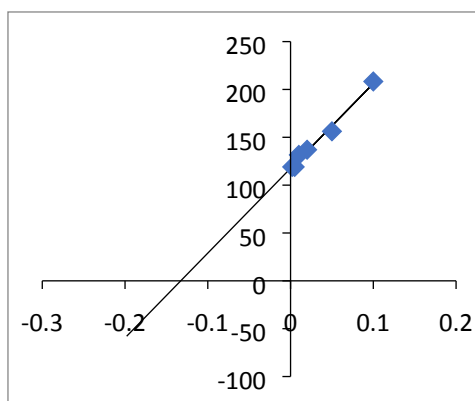

|               |                                       |
|---------------|---------------------------------------|
| $K_m$         | $8.75 \pm 1.38 \mu M$                 |
| $k_{cat}/K_M$ | $1.23 \text{ s}^{-1} \text{ mM}^{-1}$ |
| $k_{cat}$     | $0.0107 \text{ s}^{-1}$               |

Fig 27: Michaelis menten and Lineweaver-Burk plots for 76E2

### 3) a) 76E5 UDP Glucose

#### Michaelis menten plot

| S (uM) | V (uM/min) |
|--------|------------|
| 0      | 0          |
| 10     | 0.0087     |
| 20     | 0.0116     |
| 50     | 0.014      |
| 100    | 0.0146     |
| 200    | 0.0151     |
| 500    | 0.0153     |

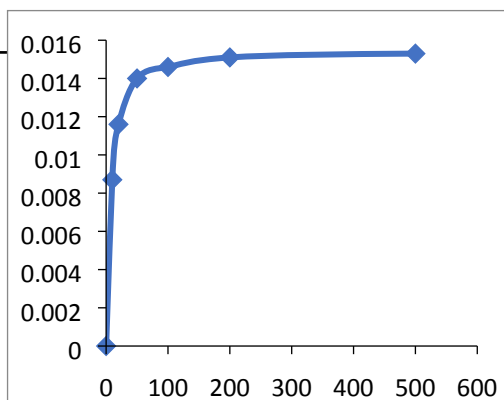

#### Lineweaver Burk

1/S

1/V

|       |          |
|-------|----------|
| 0.1   | 114.9425 |
| 0.05  | 86.2069  |
| 0.02  | 71.42857 |
| 0.01  | 68.49315 |
| 0.005 | 66.22517 |
| 0.002 | 65.35948 |

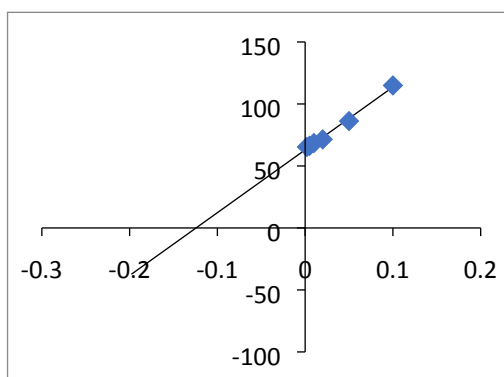

**K<sub>m</sub>** 8.79± 1.64 μM

**k<sub>cat</sub>/K<sub>M</sub>** 2.21 s<sup>-1</sup>mM<sup>-1</sup>

**k<sub>cat</sub>** 0.0194 s<sup>-1</sup>

Fig 28a: Michaelis menten and Lineweaver-Burk plots for 76E5

## b) 76E5 UDP Galactose

### Michaelis menten plot

| S (uM) | V (uM/min) |
|--------|------------|
| 0      | 0          |
| 0.1    | 0.0019     |
| 0.2    | 0.0034     |
| 0.5    | 0.0046     |
| 1      | 0.0084     |
| 5      | 0.0102     |
| 10     | 0.0103     |

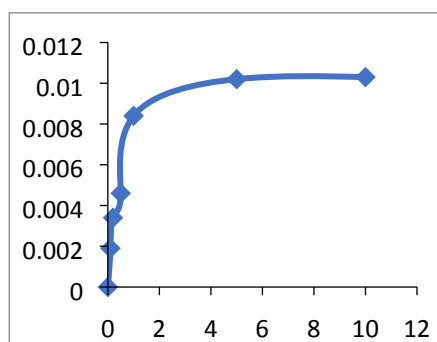

### Lineweaver Burk

| 1/S | 1/V      |
|-----|----------|
| 10  | 526.3158 |
| 5   | 294.1176 |
| 2   | 217.3913 |
| 1   | 119.0476 |
| 0.2 | 98.03922 |
| 0.1 | 97.08738 |

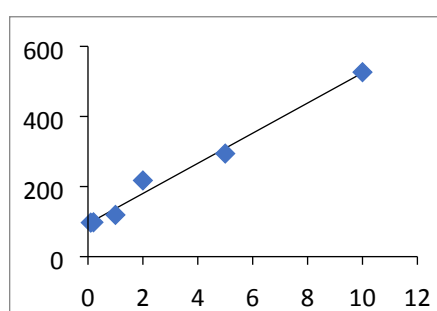

---

|       |                       |
|-------|-----------------------|
| $K_m$ | $0.57 \pm 0.19 \mu M$ |
|-------|-----------------------|

|               |                                       |
|---------------|---------------------------------------|
| $k_{cat}/K_M$ | $22.8 \text{ s}^{-1} \text{ mM}^{-1}$ |
|---------------|---------------------------------------|

---

|           |                         |
|-----------|-------------------------|
| $k_{cat}$ | $0.0130 \text{ s}^{-1}$ |
|-----------|-------------------------|

---

Fig 28b: Michaelis menten and Lineweaver-Burk plots for 76E5

## c) 76E5 UDP N-acetyl glucosamine

### Michaelis menten plot

| S (uM) | V (uM/min) |
|--------|------------|
| 0      | 0          |
| 0.5    | 0.006      |
| 1      | 0.007      |
| 2      | 0.0105     |
| 5      | 0.013      |
| 10     | 0.0131     |

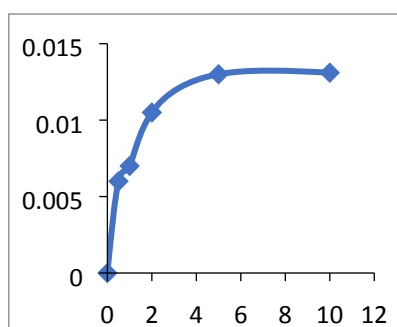

### Lineweaver Burk

| 1/S | 1/V      |
|-----|----------|
| 2   | 166.6667 |
| 1   | 142.8571 |
| 0.5 | 95.2381  |
| 0.2 | 76.92308 |
| 0.1 | 76.33588 |

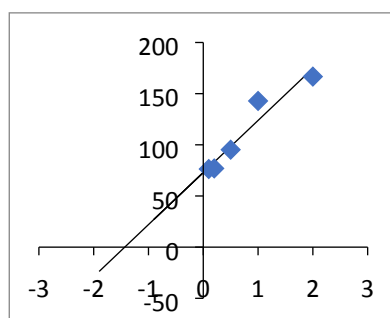

**K<sub>m</sub>**            0.78 ± 0.28 μM  
**k<sub>cat</sub>/K<sub>M</sub>**        21.3 s<sup>-1</sup>mM<sup>-1</sup>  
**k<sub>cat</sub>**             0.0166 s<sup>-1</sup>

Fig 28c: Michaelis menten and Lineweaver-Burk plots for 76E5

4) 76D1 UDP GLUCOSE

Michaelis menten plot

| S<br>(uM) | V (uM/min) |
|-----------|------------|
| 0         | 0          |
| 10        | 0.0009     |
| 20        | 0.0016     |
| 50        | 0.0029     |
| 100       | 0.0034     |
| 200       | 0.0037     |
| 500       | 0.0037     |

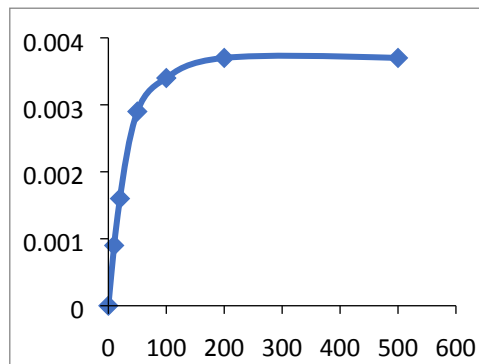

Lineweaver Burk

| 1/S   | 1/V      |
|-------|----------|
| 0.1   | 714.2857 |
| 0.05  | 625      |
| 0.02  | 344.8276 |
| 0.01  | 294.1176 |
| 0.005 | 270.2703 |
| 0.002 | 270.2703 |

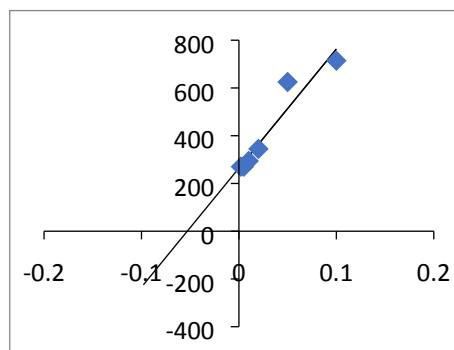

**K<sub>m</sub>**            25.77 ± 8.82 μM  
**k<sub>cat</sub>/K<sub>M</sub>**        0.185 s<sup>-1</sup>mM<sup>-1</sup>  
**k<sub>cat</sub>**             0.00476 s<sup>-1</sup>

Fig 29: Michaelis menten and Lineweaver-Burk plots for 76D1
